# Supplementary material
Source: PubMed Central journal article supplement (PMC2615470)
Supplement: NIHMS61522-supplement-si20060901_115.pdf [file NIHMS61522-supplement-si20060901_115.pdf]

Supporting Information

For

**Sigmatropic Rearrangements as Tools for Amino Acid and Peptide Modification:  
Application of the Allylic Sulfur Ylide Rearrangement to the Preparation of Neoglyco- and  
Other Conjugates**

*David Crich,\* Yekui Zou and Franck Brebion*

Department of Chemistry, University of Illinois at Chicago, 845 West Taylor Street,  
Chicago Illinois 60607-7061

## Table of Contents

| Compound                                                                                                                                                                                                      |         |
|---------------------------------------------------------------------------------------------------------------------------------------------------------------------------------------------------------------|---------|
| General Experimental                                                                                                                                                                                          | S-3     |
| 1-Diazo-2-heptadecanone                                                                                                                                                                                       | S-4,5   |
| <i>N</i> -(2,3,4,6-Tetra- <i>O</i> -acetyl- $\beta$ -D-glucopyranosyl)-diazoacetamide                                                                                                                         | S-6,7   |
| <i>N</i> -(2,3,6,2',3',4',6'-Hepta- <i>O</i> -acetyl- $\beta$ -cellobiosyl)-diazoacetamide                                                                                                                    | S-8,9   |
| <i>N</i> -( <i>tert</i> -Butoxycarbonyl)- <i>S</i> -(4-ethoxycarbonyl-1-buten-4-yl)- <i>L</i> -cysteine ethyl ester ( <b>3</b> )                                                                              | S-10,11 |
| <i>N</i> -( <i>tert</i> -Butoxycarbonyl)- <i>S</i> -(4-ethoxycarbonyl-2-methyl-1-buten-4-yl)- <i>L</i> -cysteine ethyl ester ( <b>4</b> )                                                                     | S-12,13 |
| <i>N</i> -( <i>tert</i> -Butoxycarbonyl)- <i>S</i> -(4-trimethylsilanyl-1-buten-4-yl)- <i>L</i> -cysteine ethyl ester ( <b>5</b> )                                                                            | S-14,15 |
| <i>N</i> -( <i>tert</i> -Butoxycarbonyl)- <i>S</i> -(2-methyl-5-oxo-4-icosyl)- <i>L</i> -cysteine ethyl ester ( <b>6</b> )                                                                                    | S-16,17 |
| <i>N</i> -( <i>tert</i> -Butoxycarbonyl)- <i>S</i> -(4-ethoxycarbonyl-1-buten-4-yl)-glutathione dimethyl ester ( <b>8</b> )                                                                                   | S-18,19 |
| <i>N</i> -( <i>tert</i> -Butoxycarbonyl)- <i>S</i> -(4-phenyl-1-buten-4-yl)-glutathione dimethyl ester ( <b>9</b> )                                                                                           | S-20,21 |
| <i>N</i> -( <i>tert</i> -Butoxycarbonyl)- <i>S</i> -(5-oxo-4-icosyl)-glutathione dimethyl ester ( <b>10</b> )                                                                                                 | S-22,23 |
| <i>N</i> -( <i>tert</i> -Butoxycarbonyl)- <i>S</i> -(1-tetradecen-4-yl)-glutathione dimethyl ester ( <b>11</b> )                                                                                              | S-24,25 |
| <i>N</i> -( <i>tert</i> -Butoxycarbonyl)- <i>S</i> -(1-tridecafluorododecen-4-yl)-glutathione dimethyl ester ( <b>12</b> )                                                                                    | S-26,27 |
| <i>N</i> -(2,3,4,6-Tetra- <i>O</i> -acetyl- $\beta$ -D-glucopyranosyl)-(2-Hexadecylsulfanyl)-4-pentenamide ( <b>16</b> )                                                                                      | S-28,29 |
| <i>N</i> -( <i>tert</i> -Butoxycarbonyl)- <i>S</i> -(4- <i>N</i> -(2,3,4,6-Tetra- <i>O</i> -acetyl- $\beta$ -D-glucopyranosyl)-aminocarbonyl-1-buten-4-yl)- <i>L</i> -cysteine ethyl ester ( <b>17</b> )      | S-30,31 |
| <i>N</i> -( <i>tert</i> -Butoxycarbonyl)- <i>S</i> -(4- <i>N</i> -(2,3,6,2',3',4',6'-hepta- <i>O</i> -acetyl- $\beta$ -cellobiosyl)-aminocarbonyl-1-buten-4-yl)- <i>L</i> -cysteine ethyl ester ( <b>18</b> ) | S-32,33 |
| <i>N</i> -( <i>tert</i> -Butoxycarbonyl)- <i>S</i> -(4- <i>N</i> -(2,3,4,6-Tetra- <i>O</i> -acetyl- $\beta$ -D-glucopyranosyl)-aminocarbonyl-1-buten-4-yl)-glutathione dimethyl ester ( <b>19</b> )           | S-34,35 |
| <i>N</i> -( <i>tert</i> -Butoxycarbonyl)- <i>S</i> -(4- <i>N</i> -(2,3,6,2',3',4',6'-hepta- <i>O</i> -acetyl- $\beta$ -cellobiosyl)-aminocarbonyl-1-buten-4-yl)-glutathione dimethyl ester ( <b>20</b> )      | S-36,37 |
| <i>N</i> -( <i>tert</i> -Butoxycarbonyl)- <i>S</i> -(2-methyl-5-oxo-4-icosyl)- <i>L</i> -cysteinyl- <i>L</i> -alanyl- <i>L</i> -tryptophan methyl ester ( <b>21</b> )                                         | S-38,39 |
| <i>N</i> -( <i>tert</i> -Butoxycarbonyl)- <i>S</i> -(2-methylallyl)- <i>L</i> -cysteinyl- <i>L</i> -alanyl- <i>L</i> - $N_{\omega}$ -(2-oxo-heptadecyl)-tryptophan methyl ester ( <b>22</b> )                 | S-40,41 |

**General.** Unless otherwise indicated, all reagents were obtained from commercial sources and used without further purification. All reactions were performed under a nitrogen atmosphere, unless otherwise indicated. All NMR spectra were recorded at 500 MHz for  $^1\text{H}$  and 125 MHz for  $^{13}\text{C}$  with  $\text{CDCl}_3$  as solvent, unless otherwise indicated.



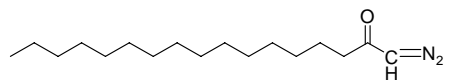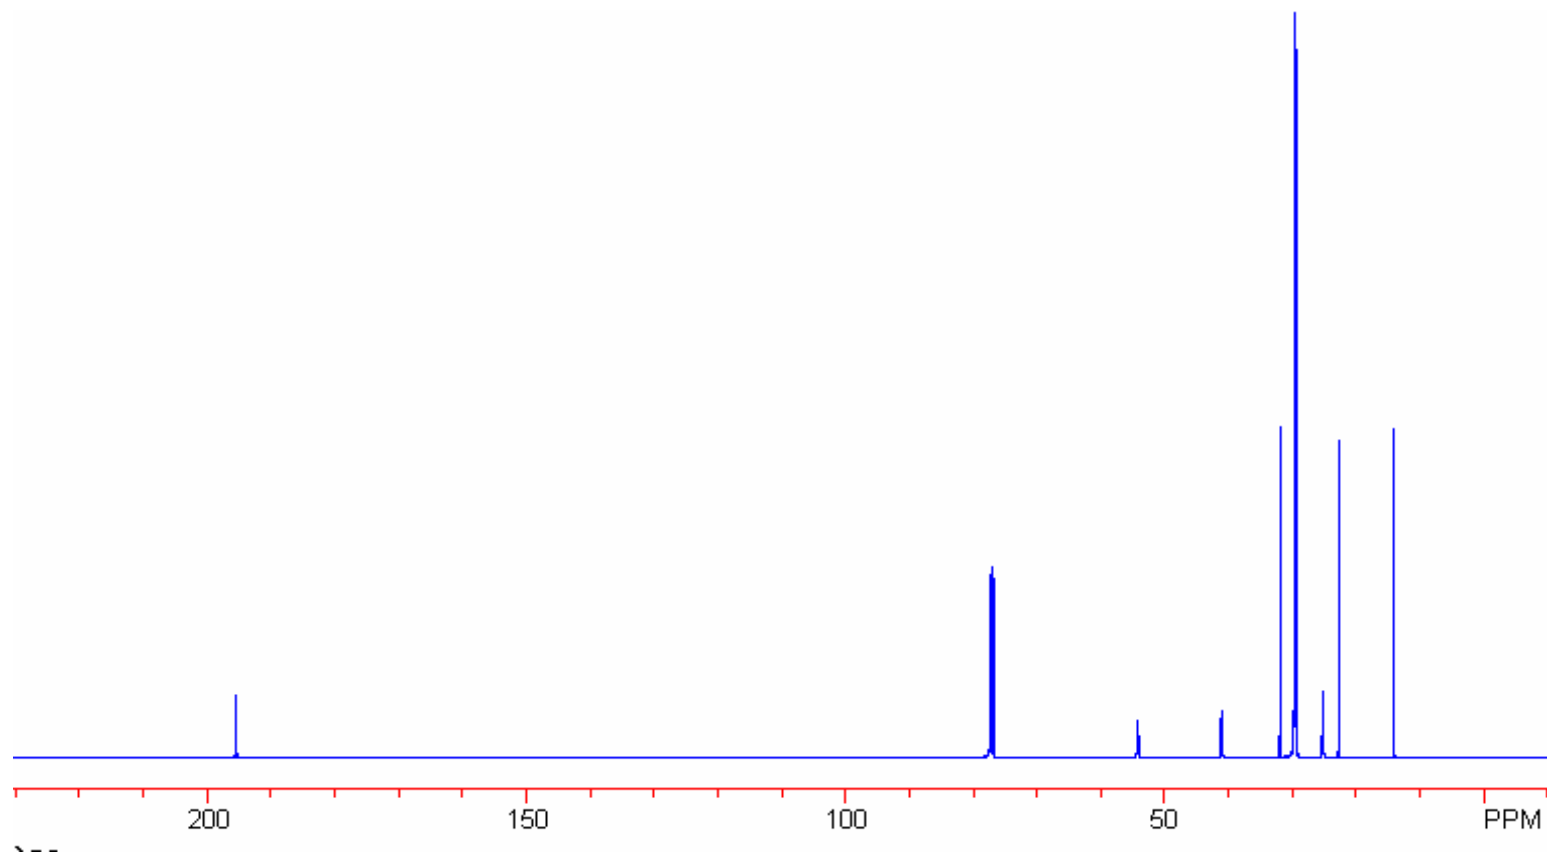

S-5

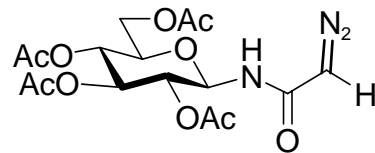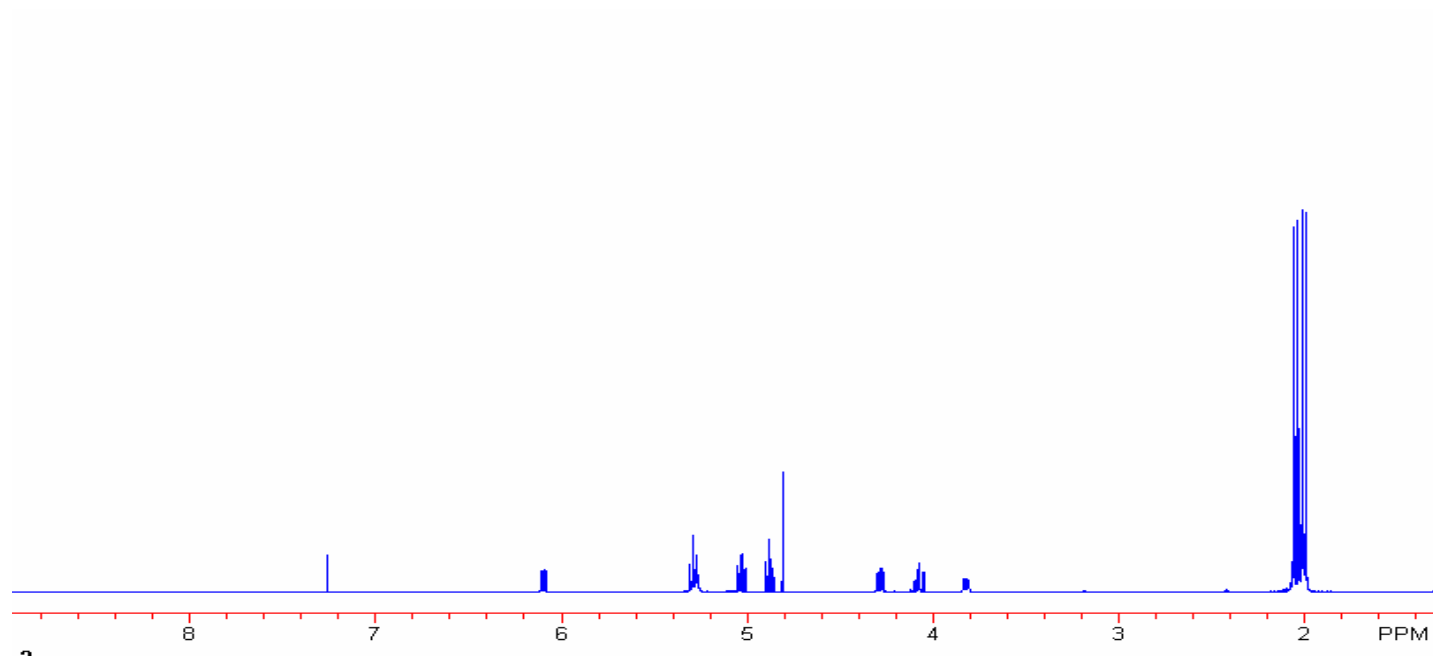

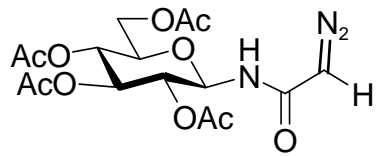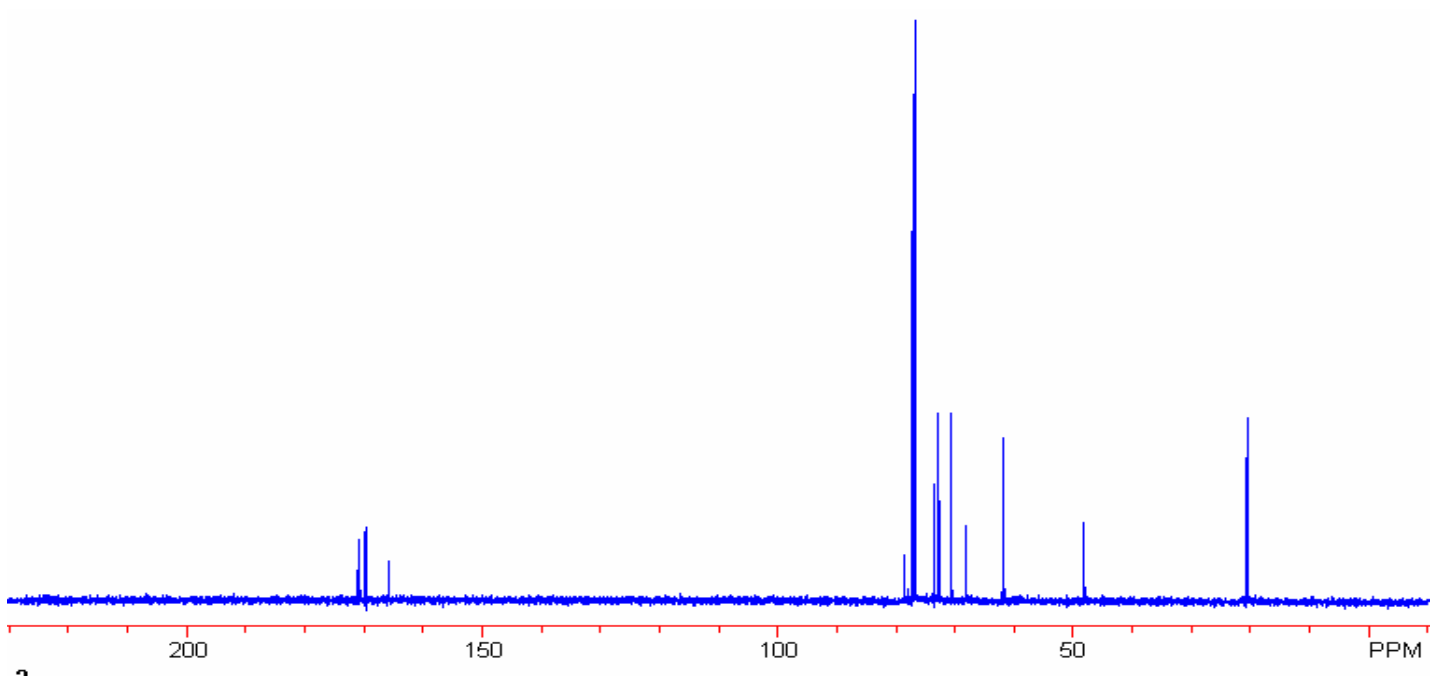

S-7

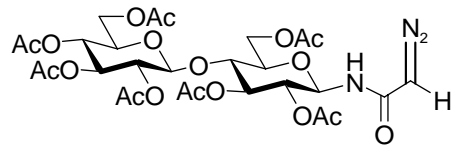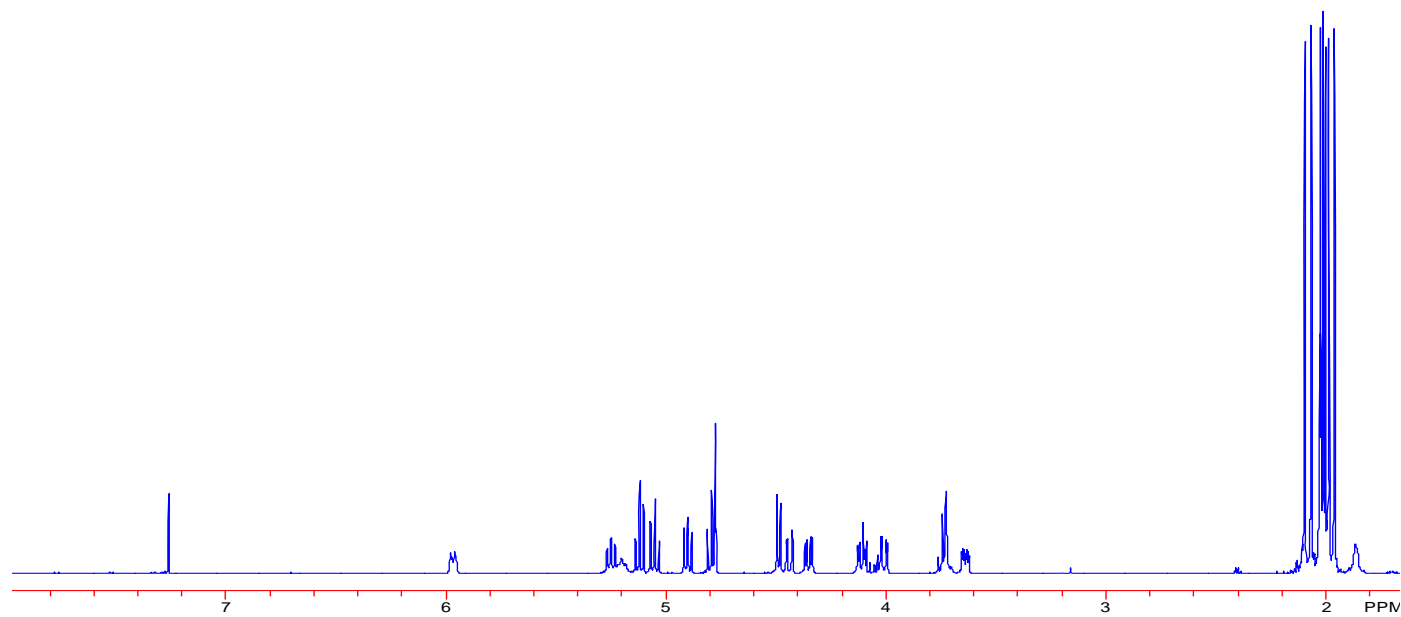



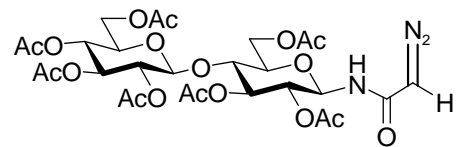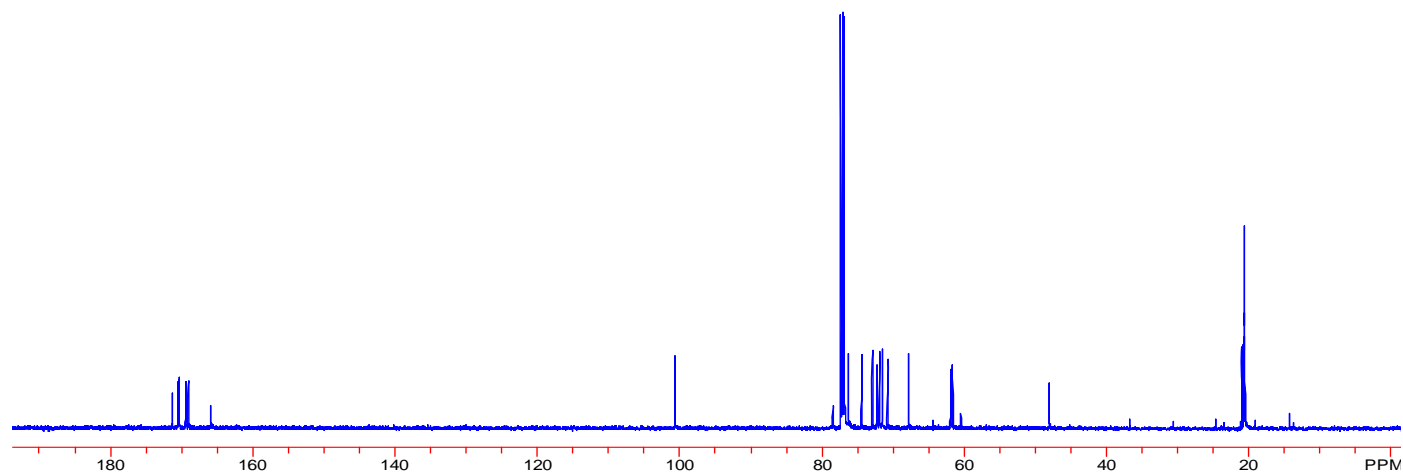

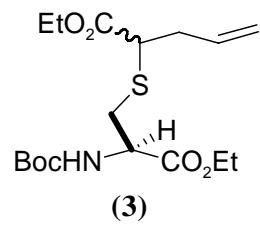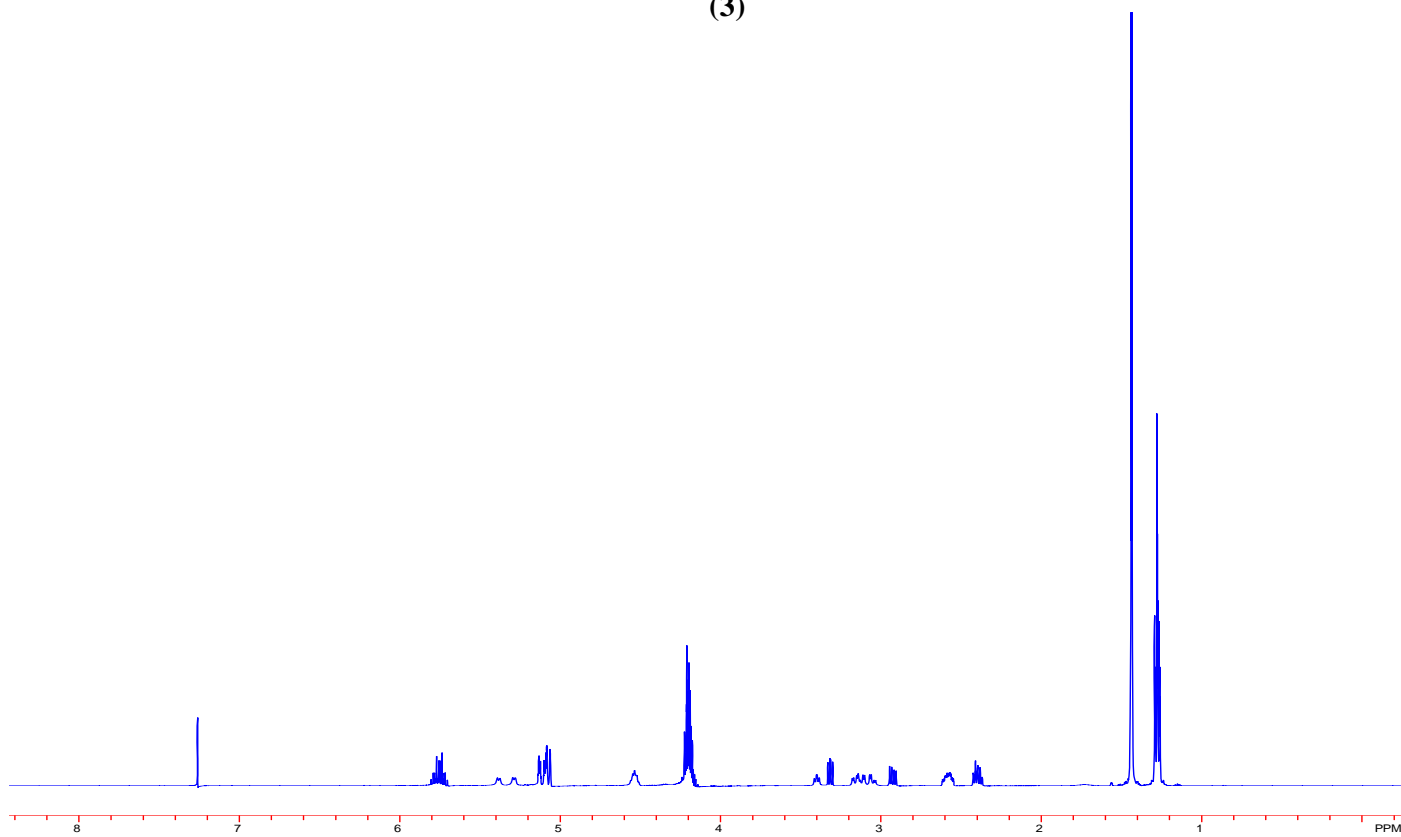

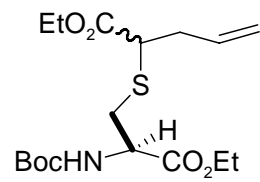

(3)

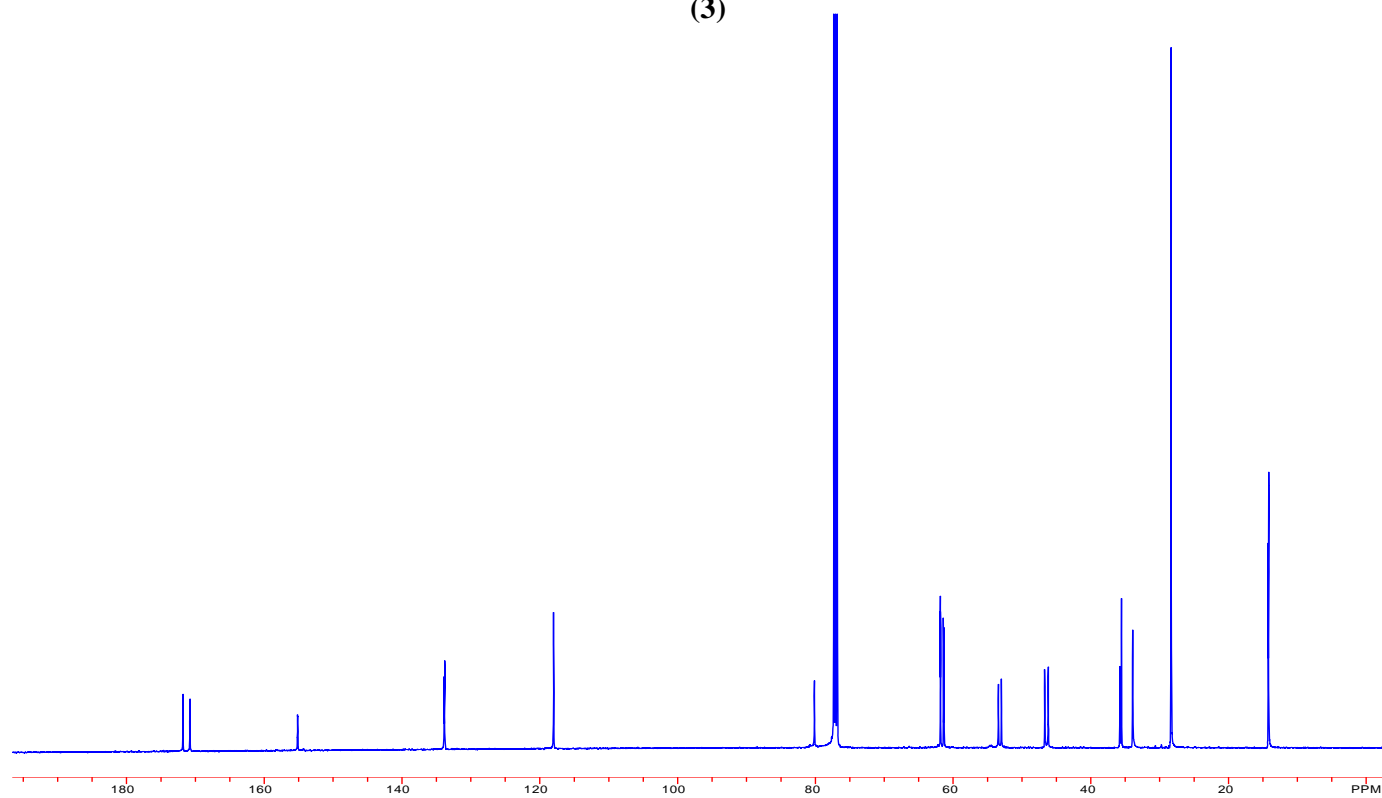

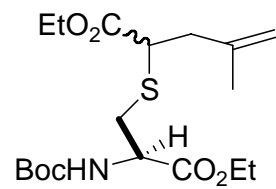

(4)

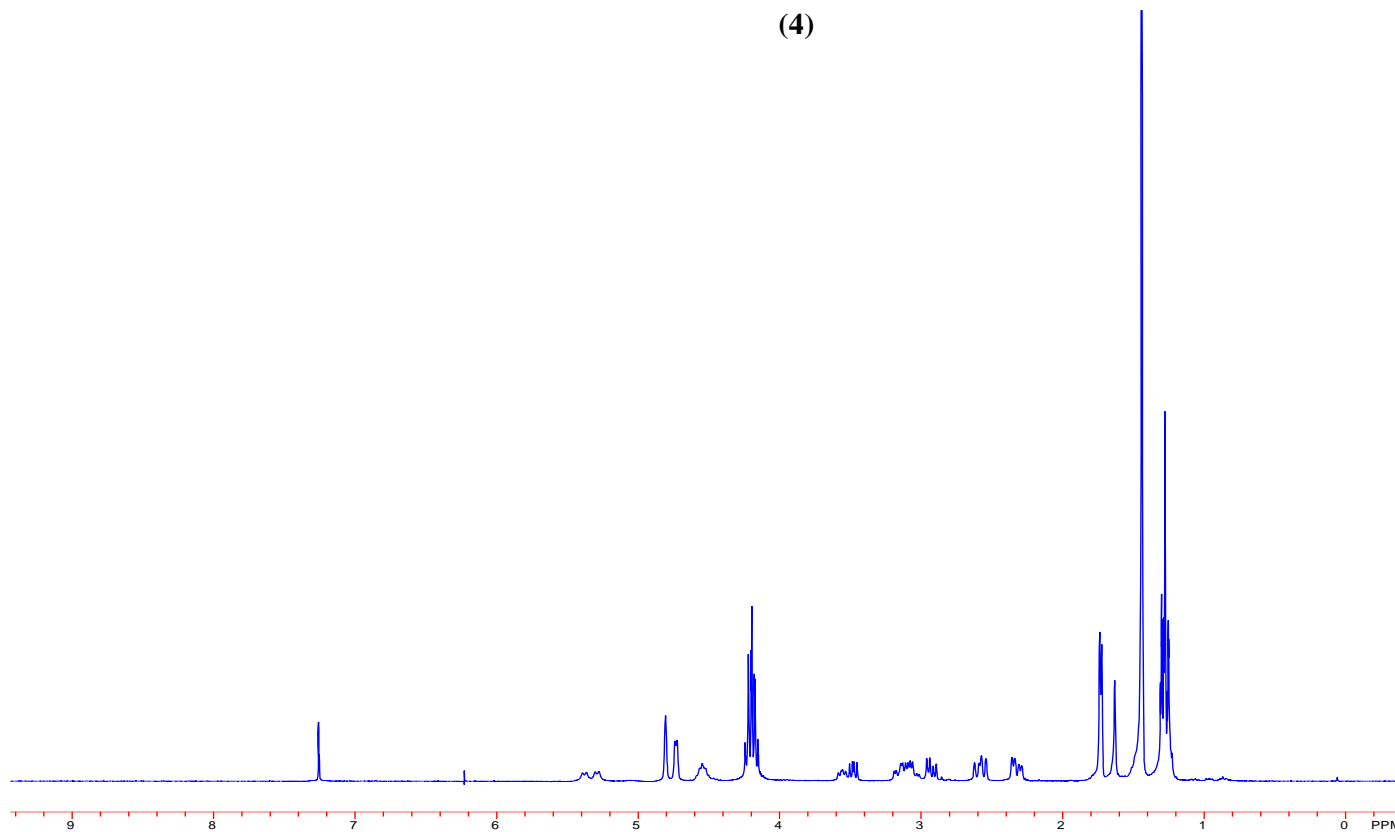

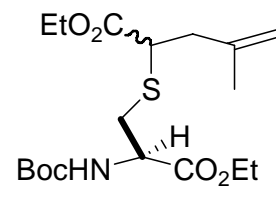

(4)

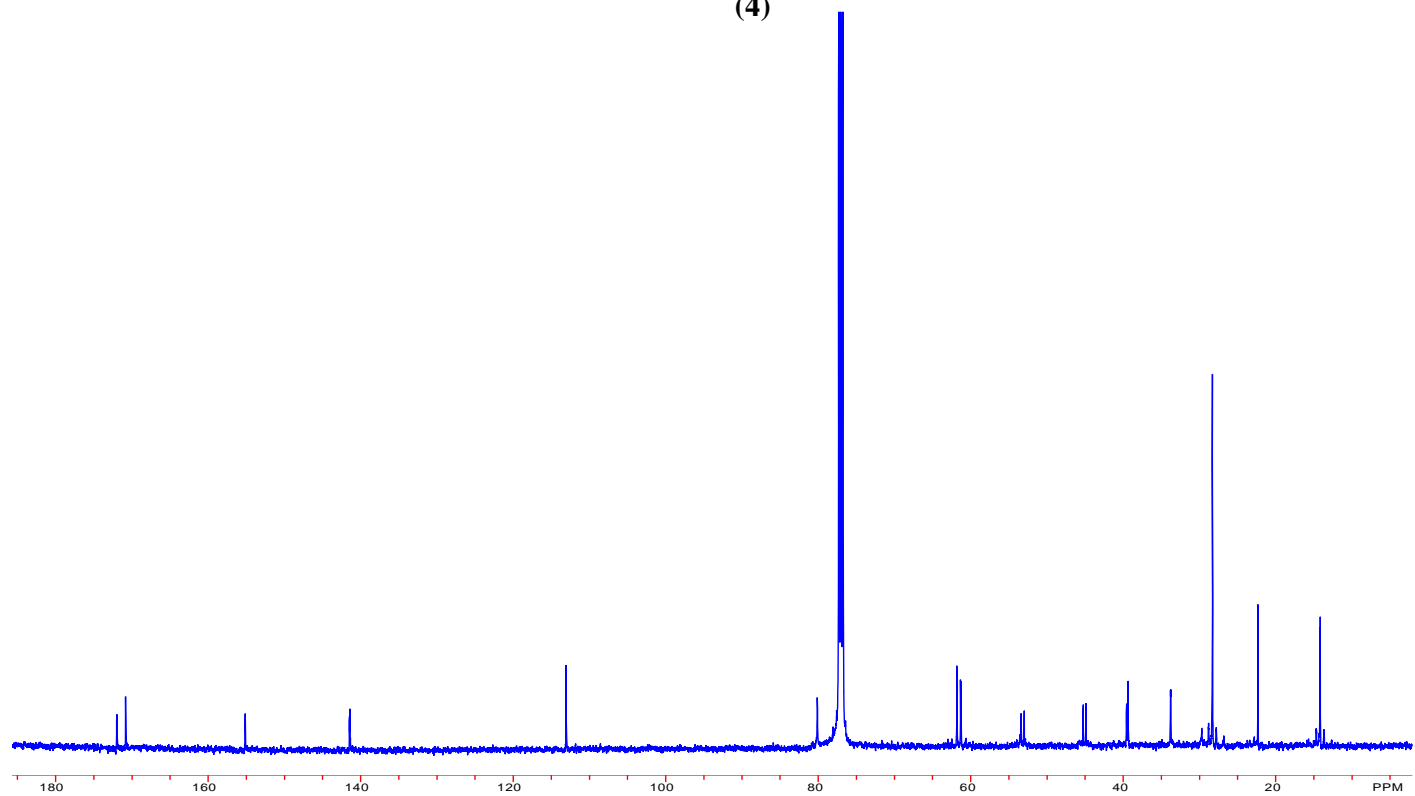

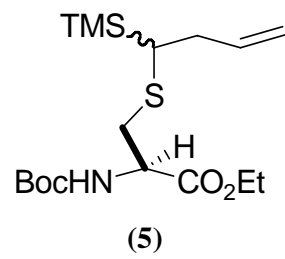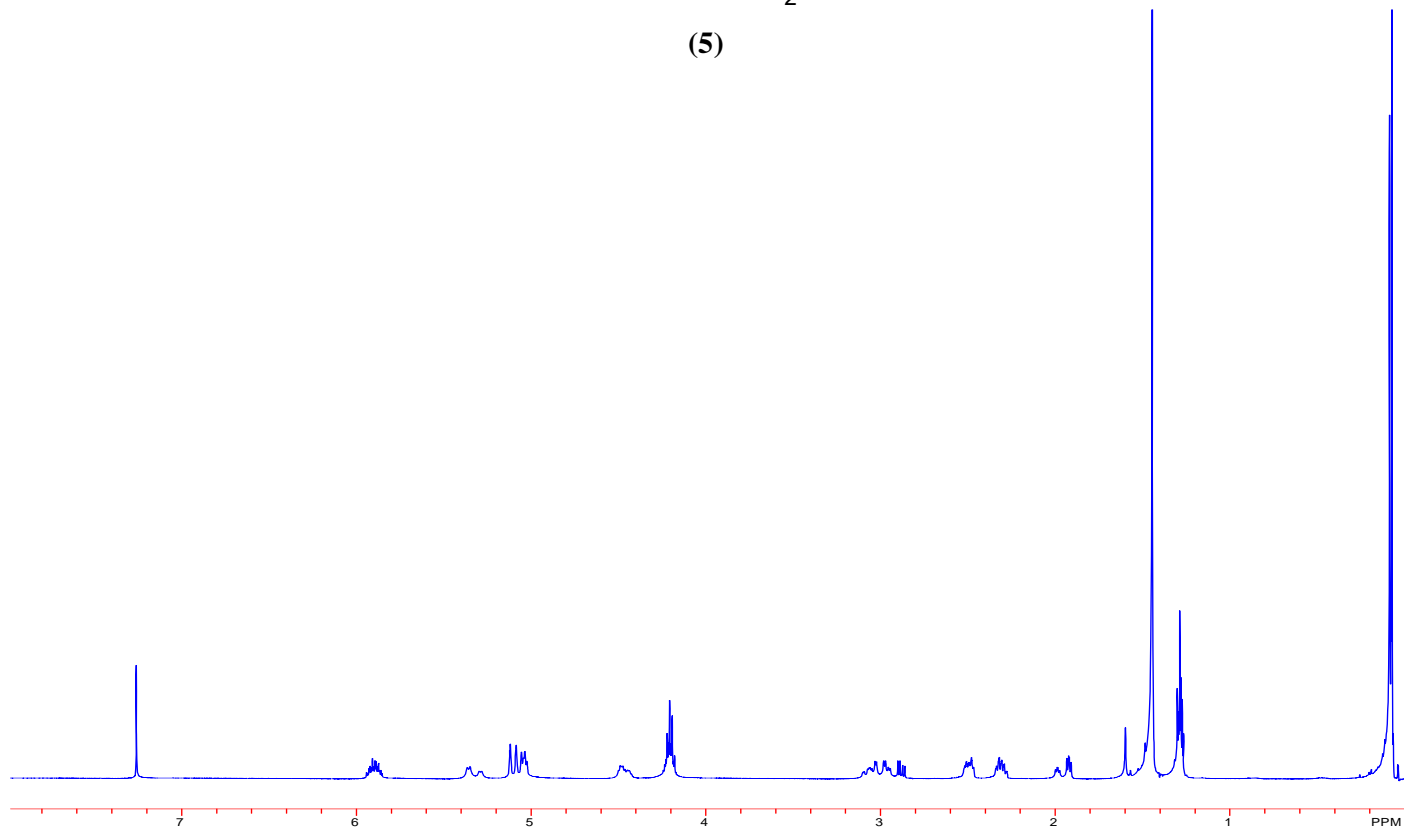

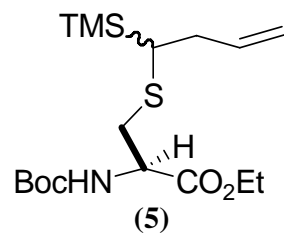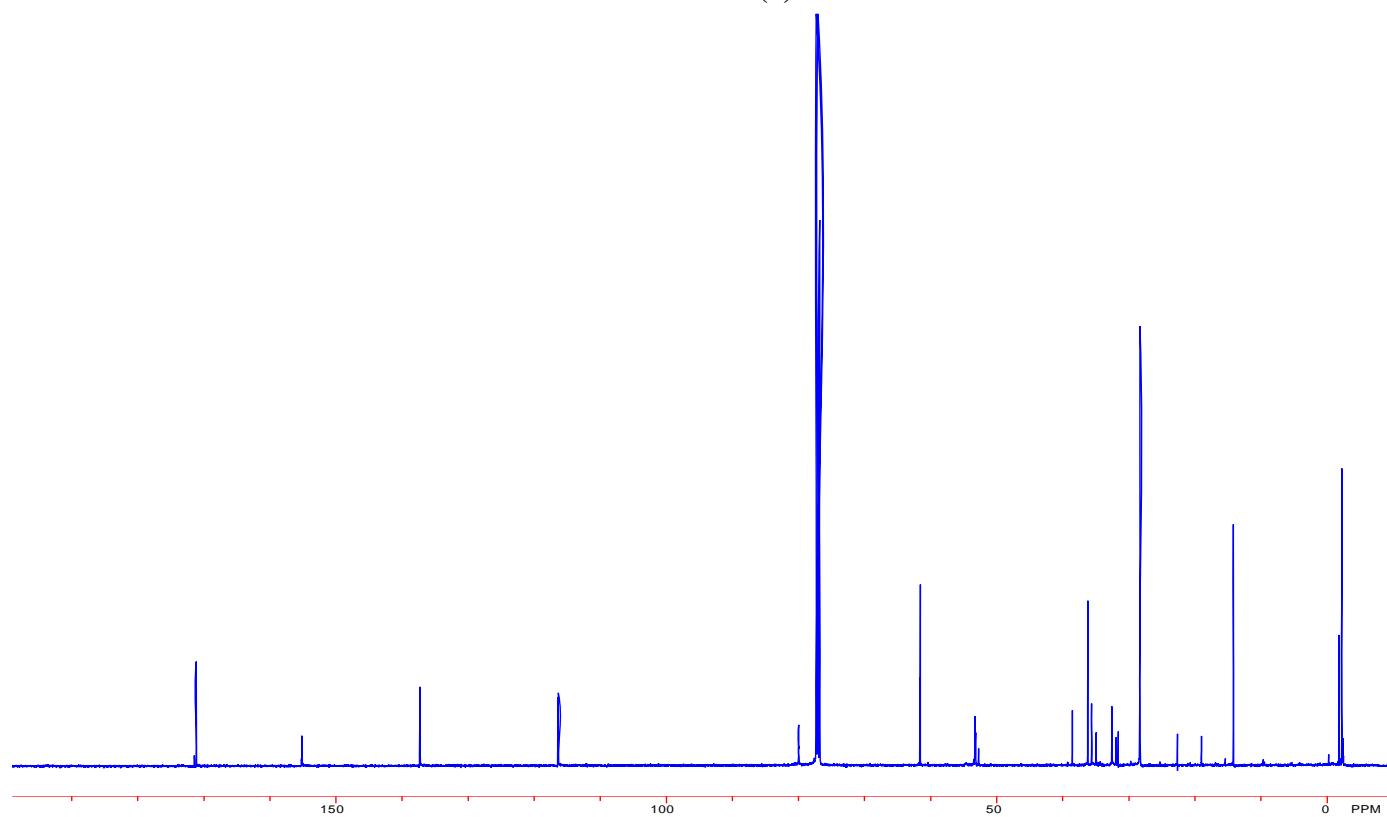

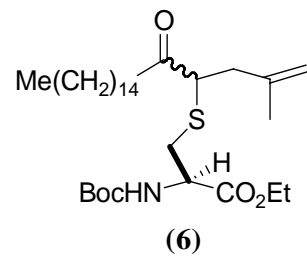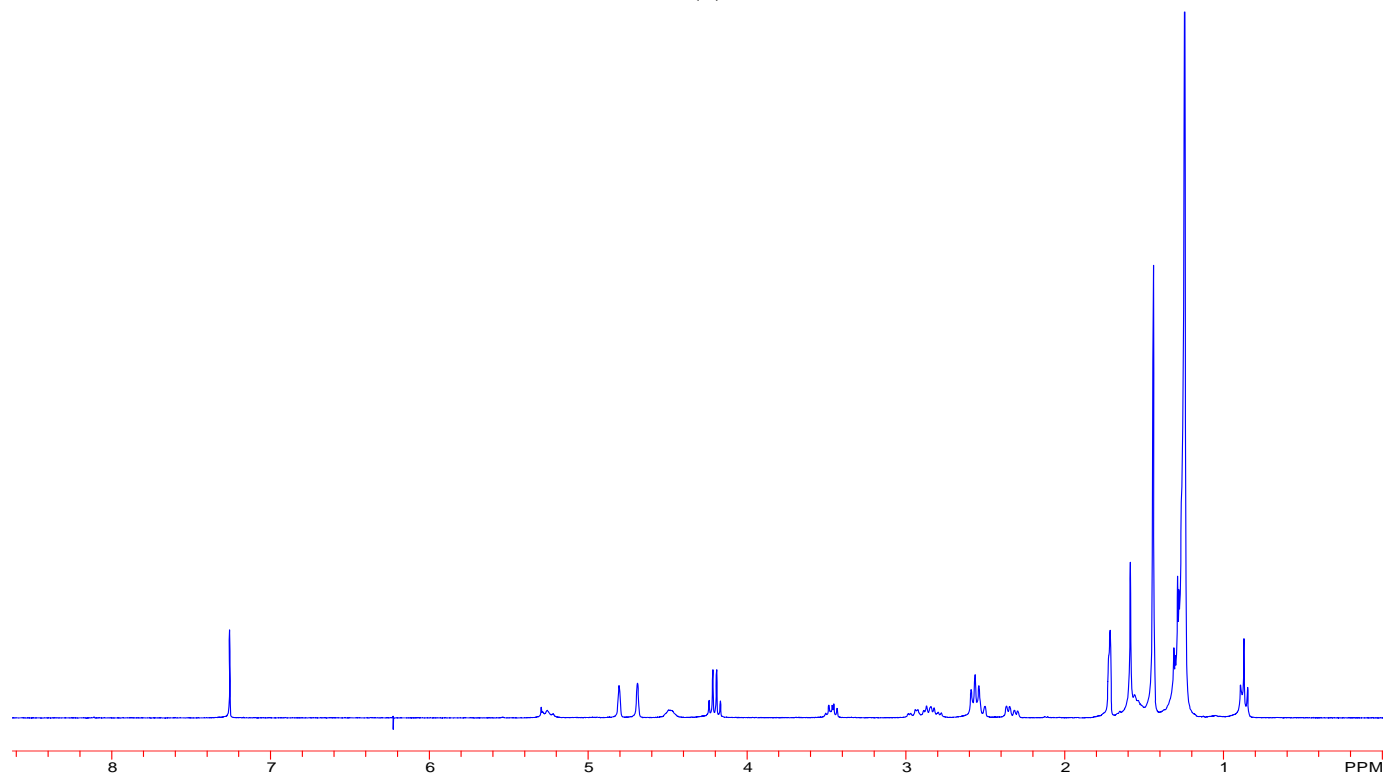



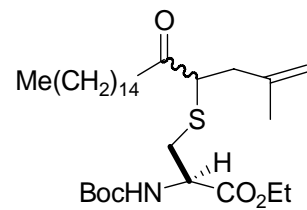

(6)

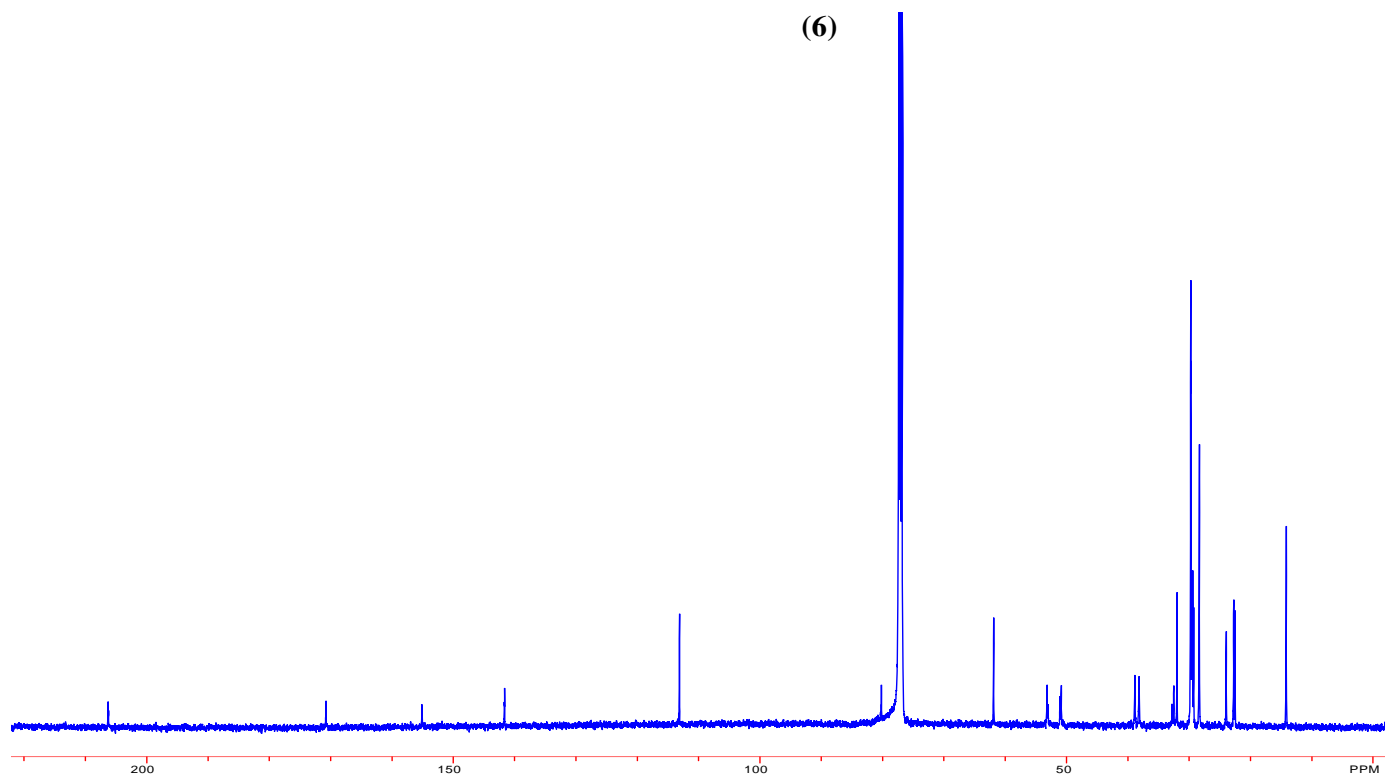



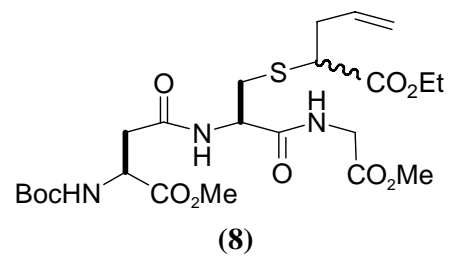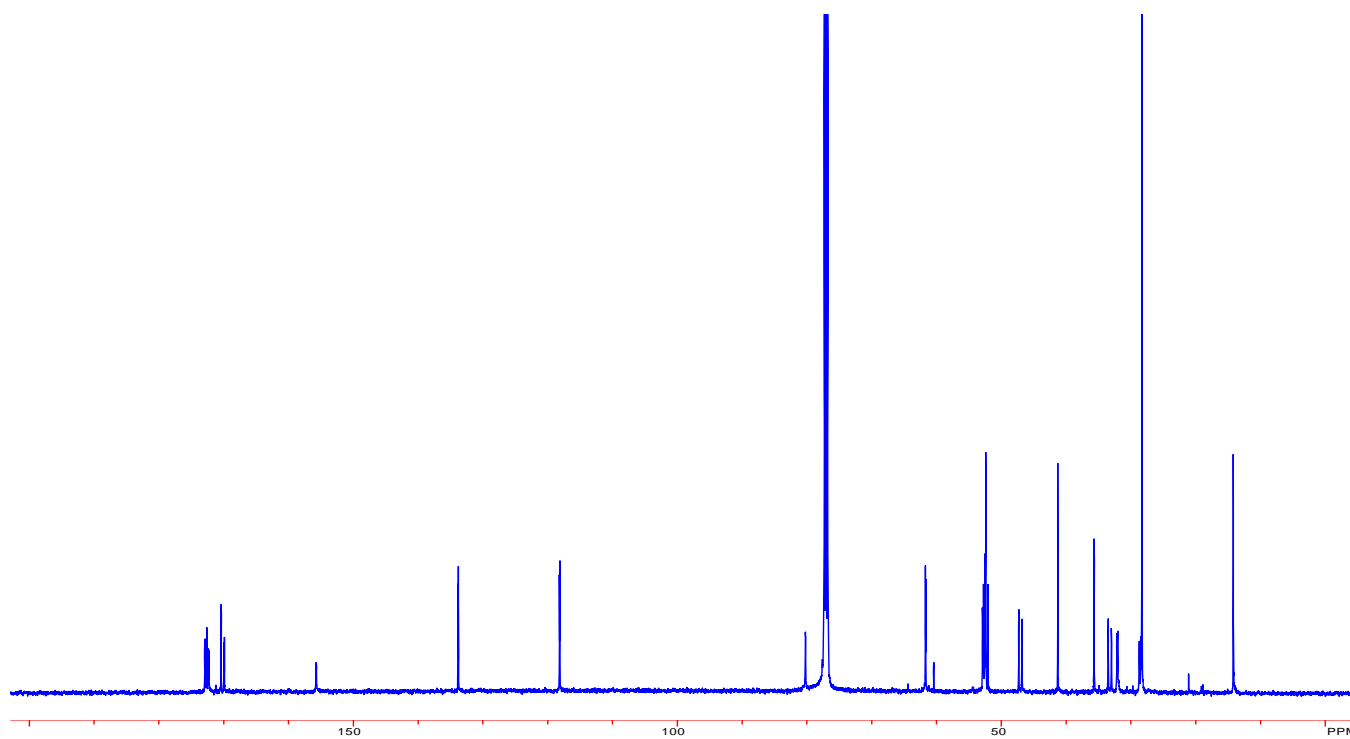

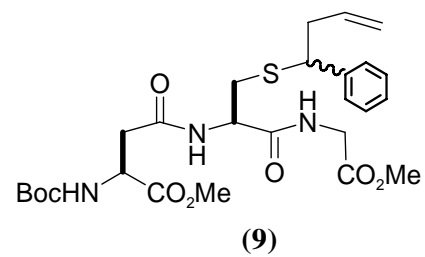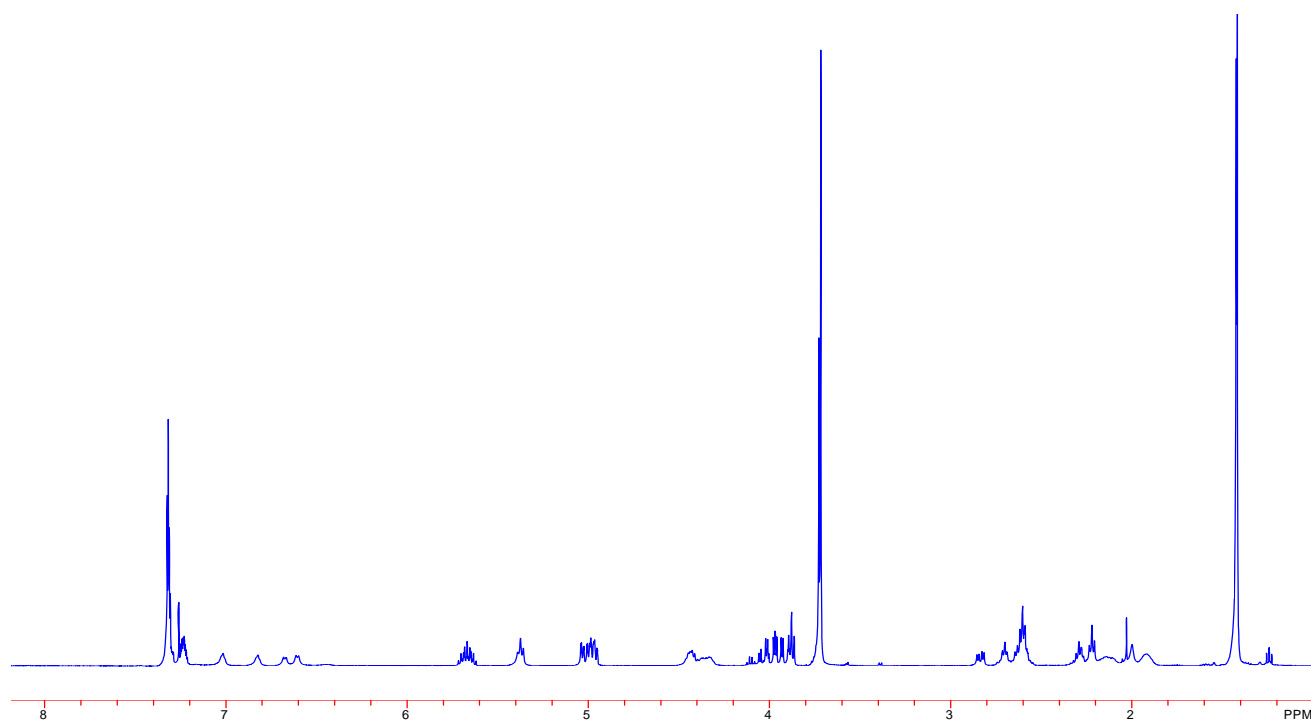

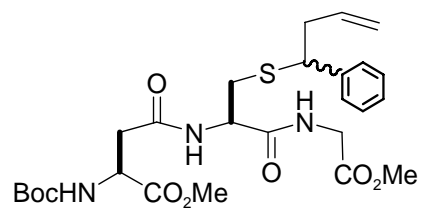

(9)

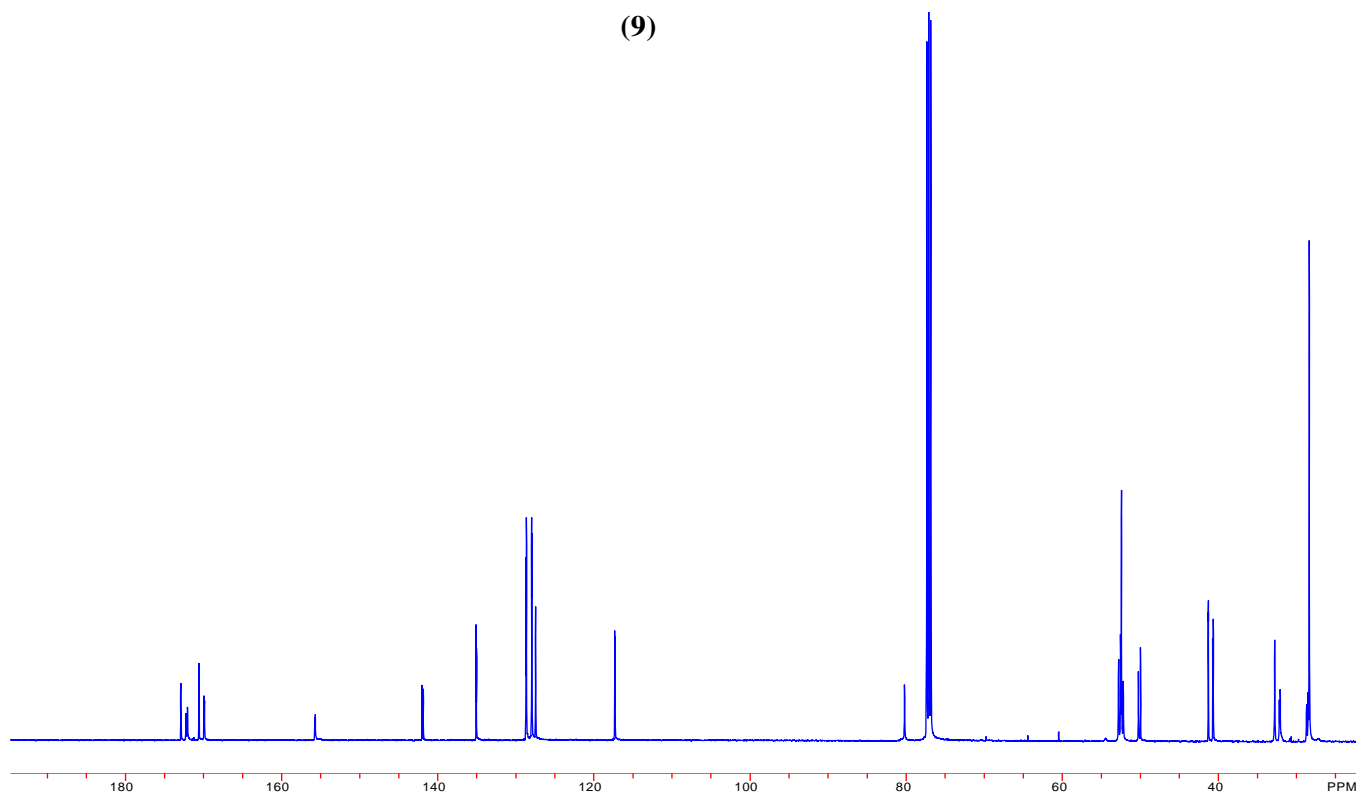

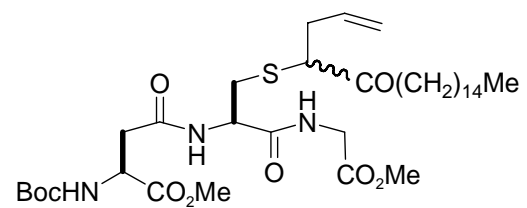

(10)

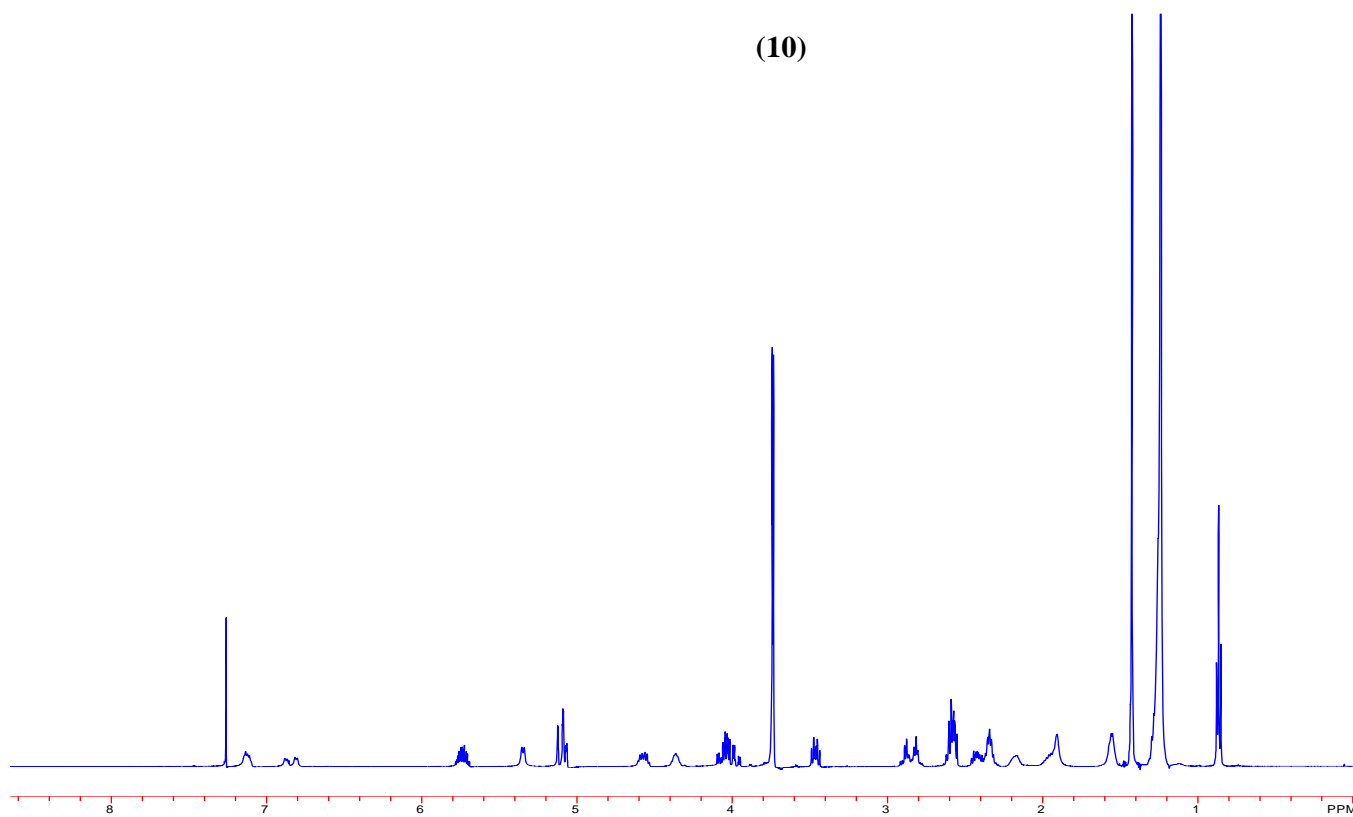

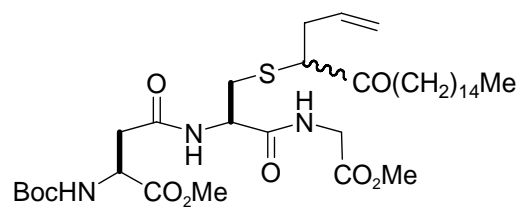

(10)

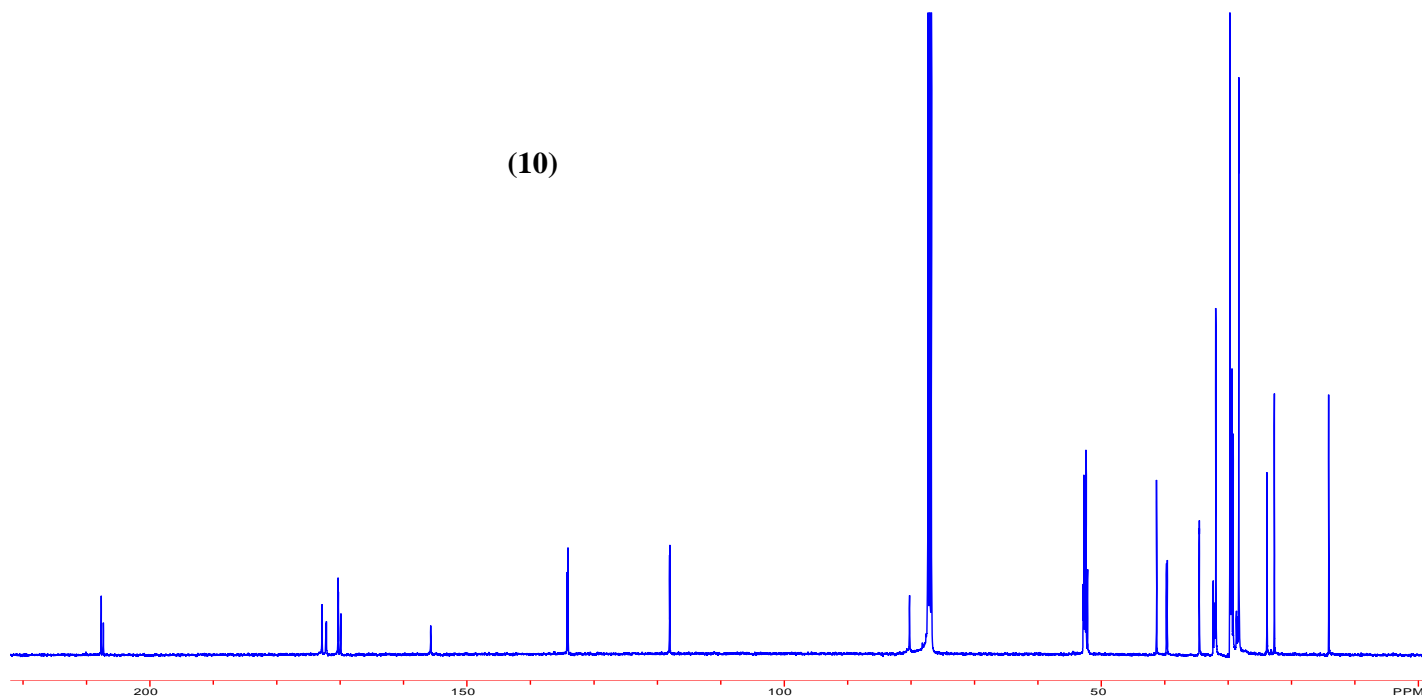

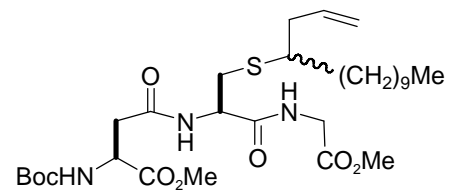

(11)

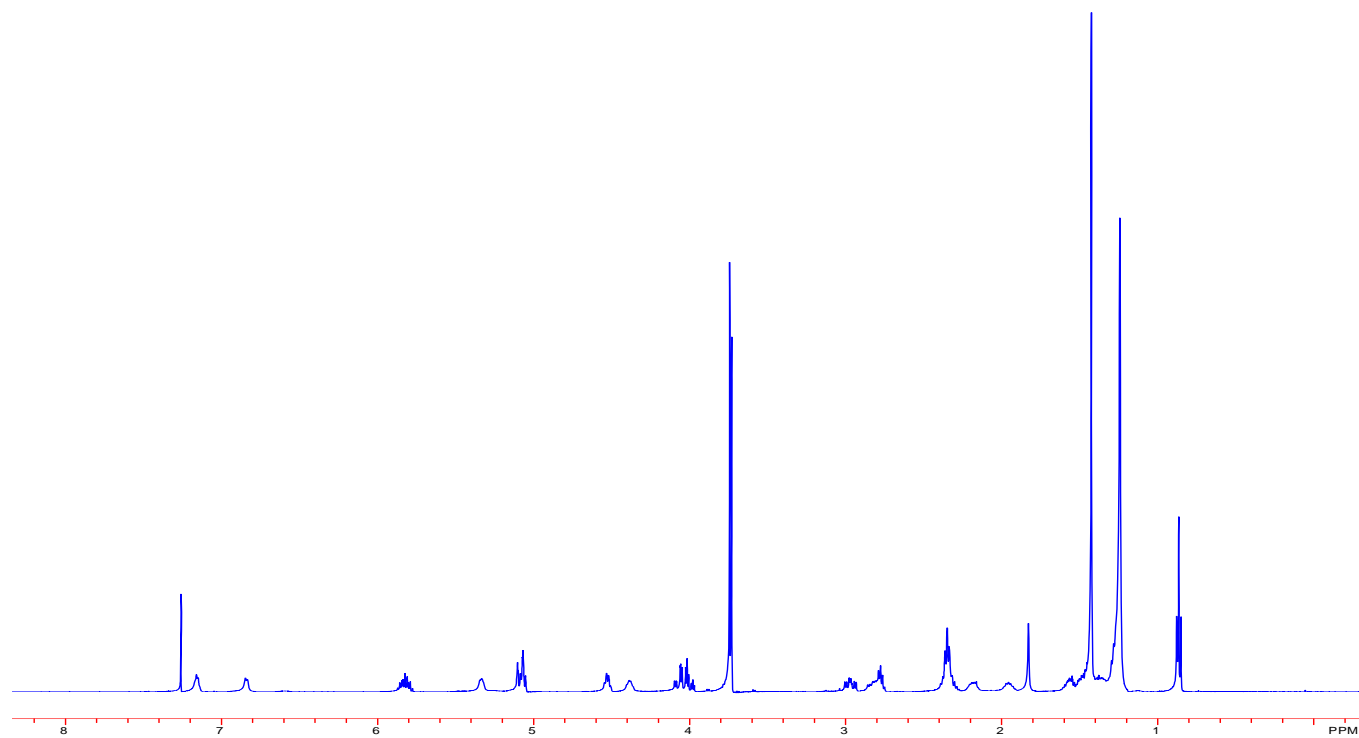



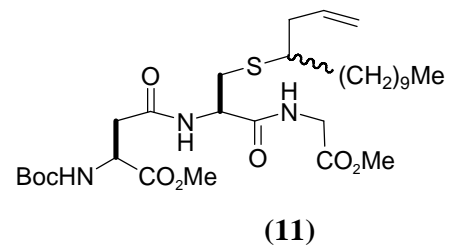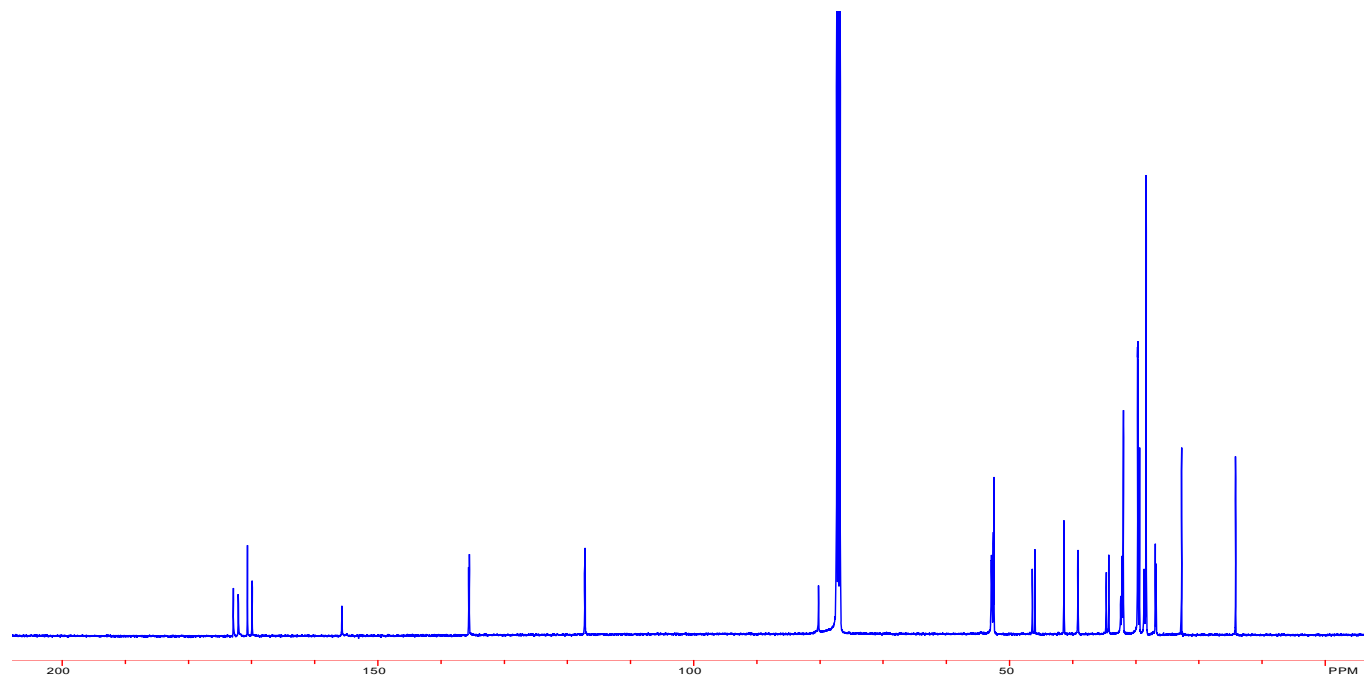

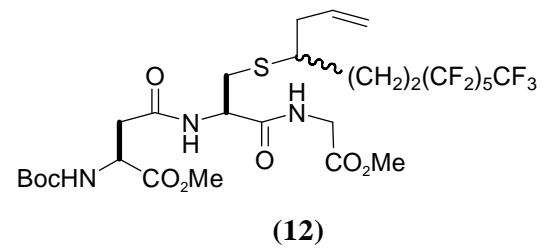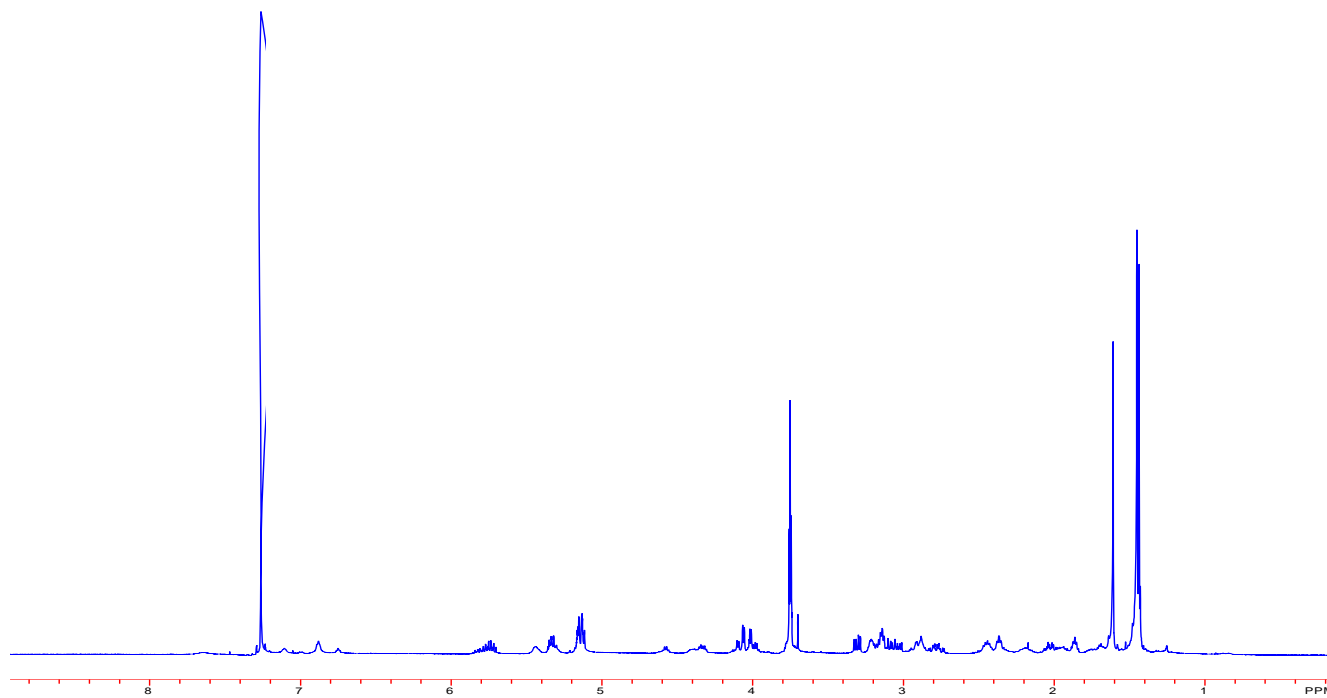

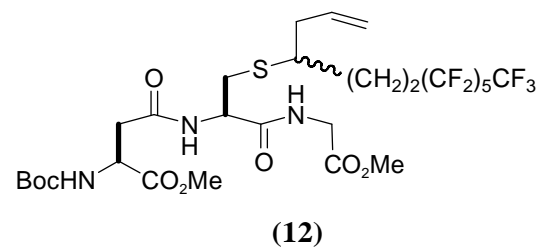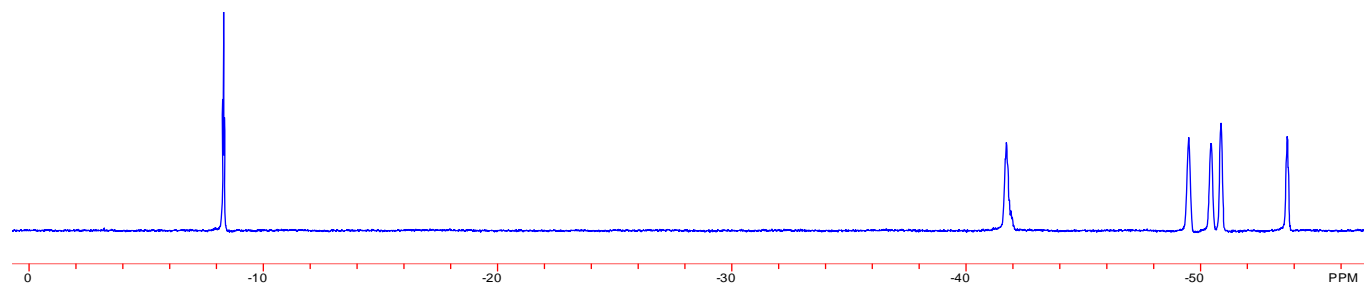

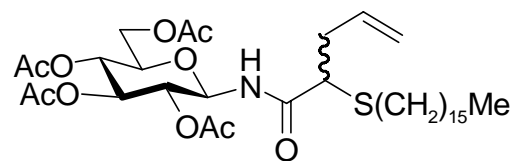

(16)

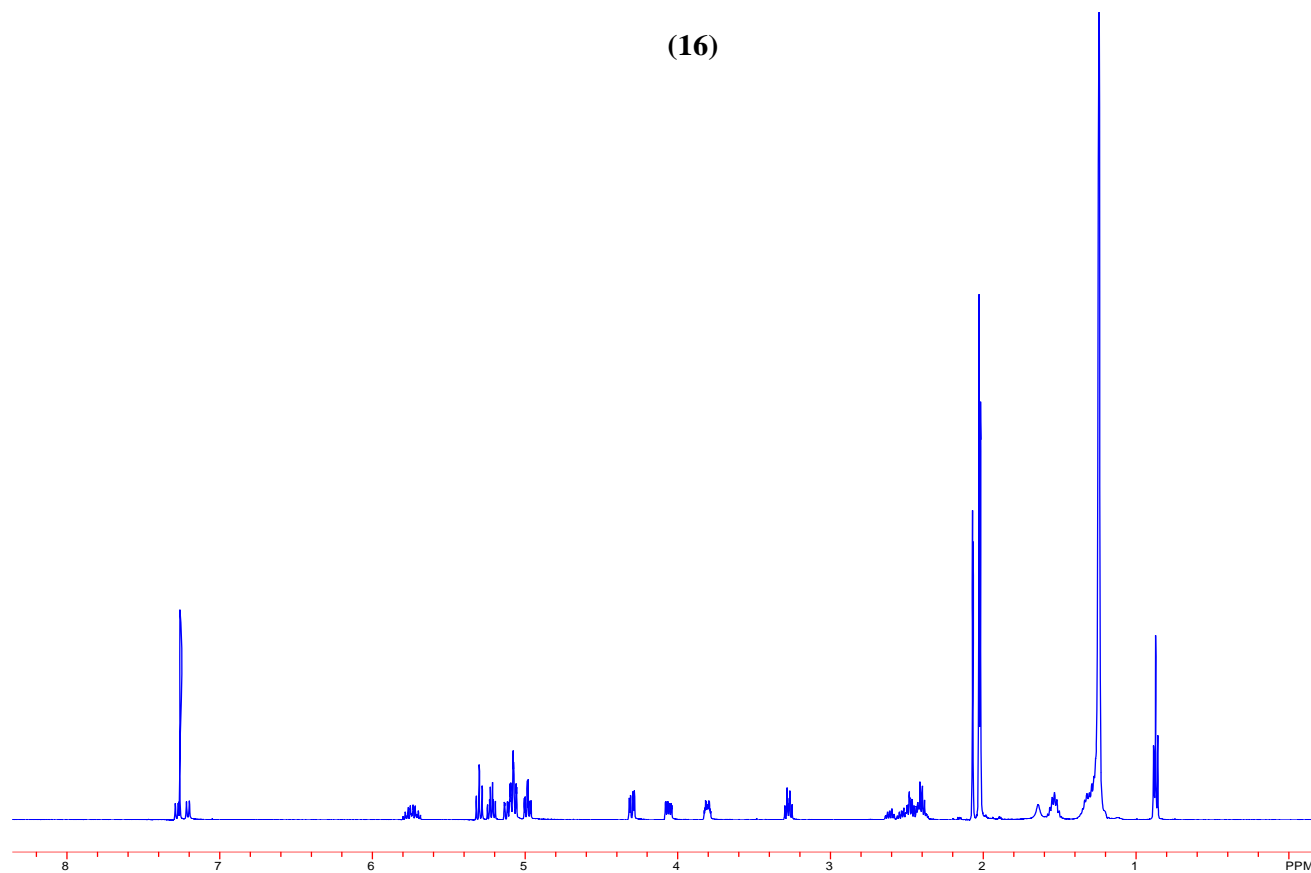



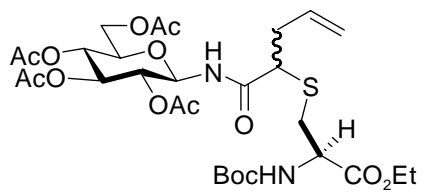

(17)

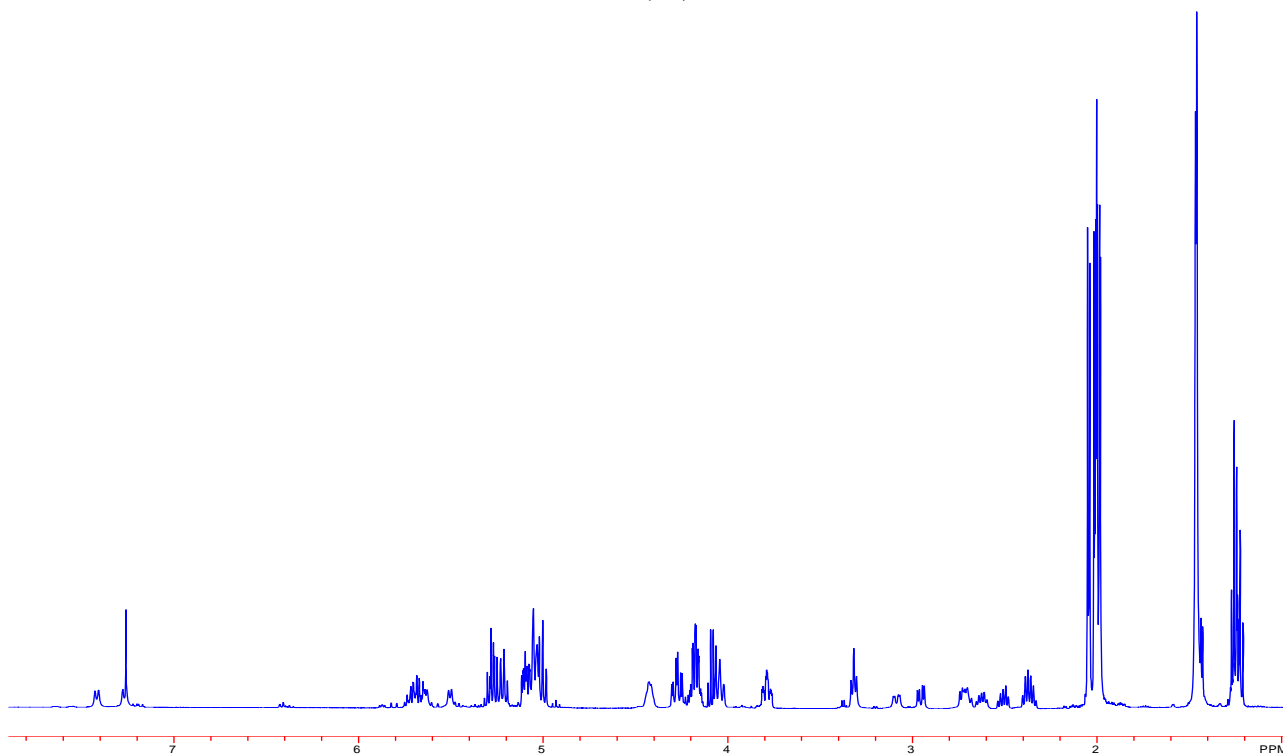

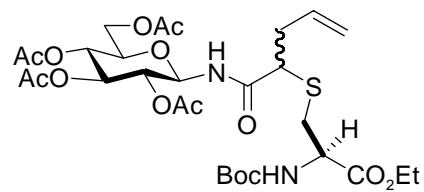

(17)

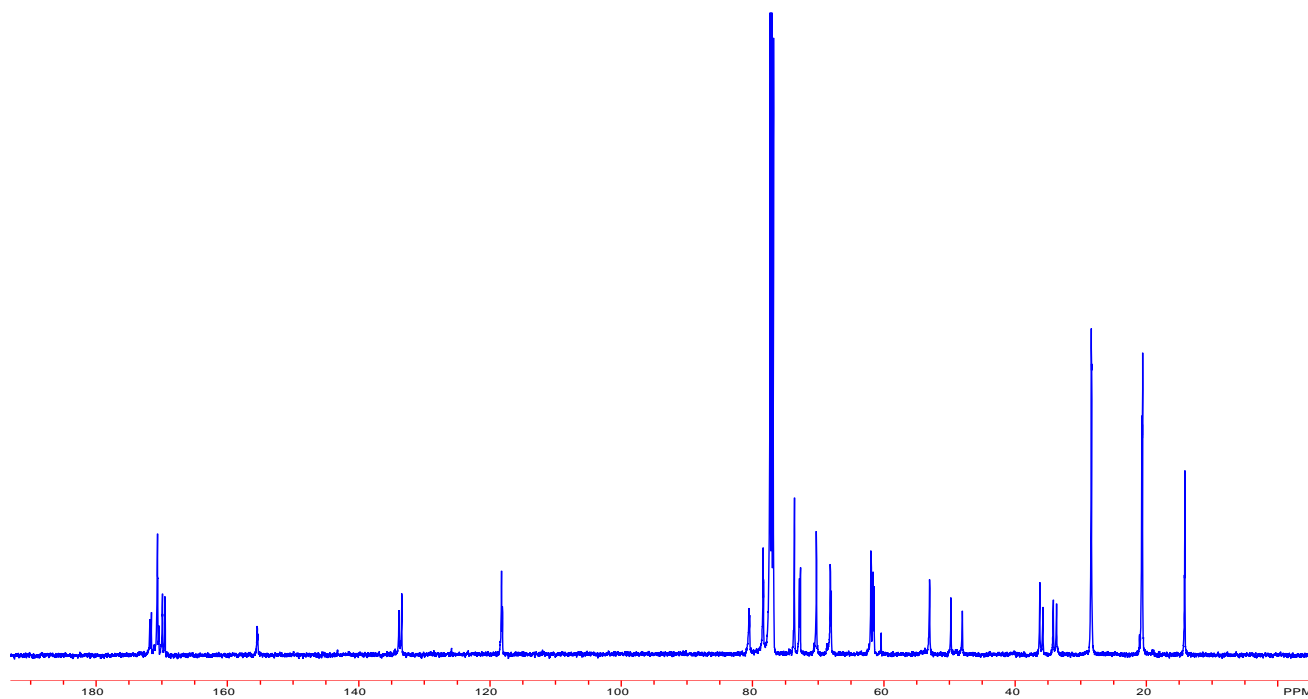

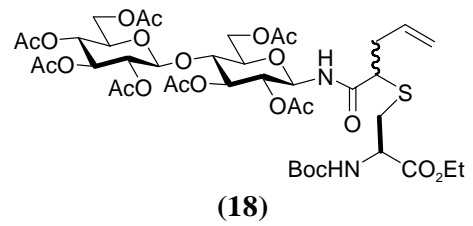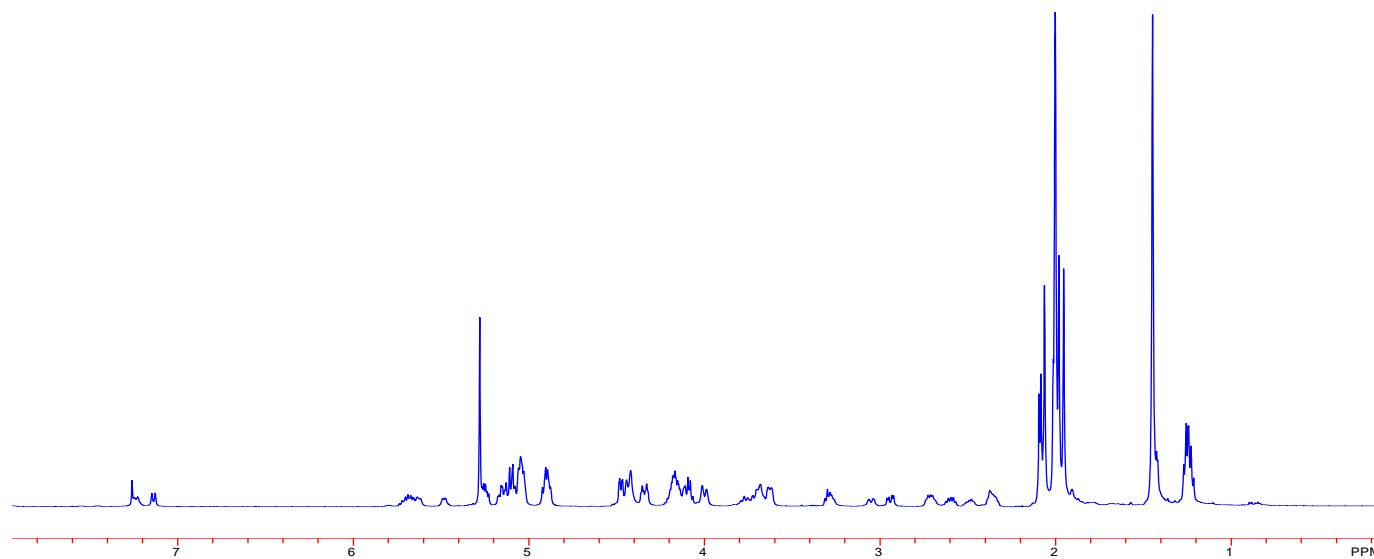



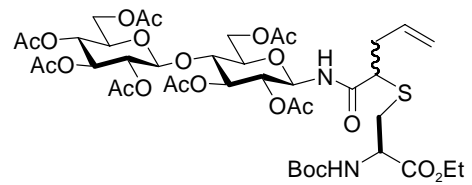

(18)

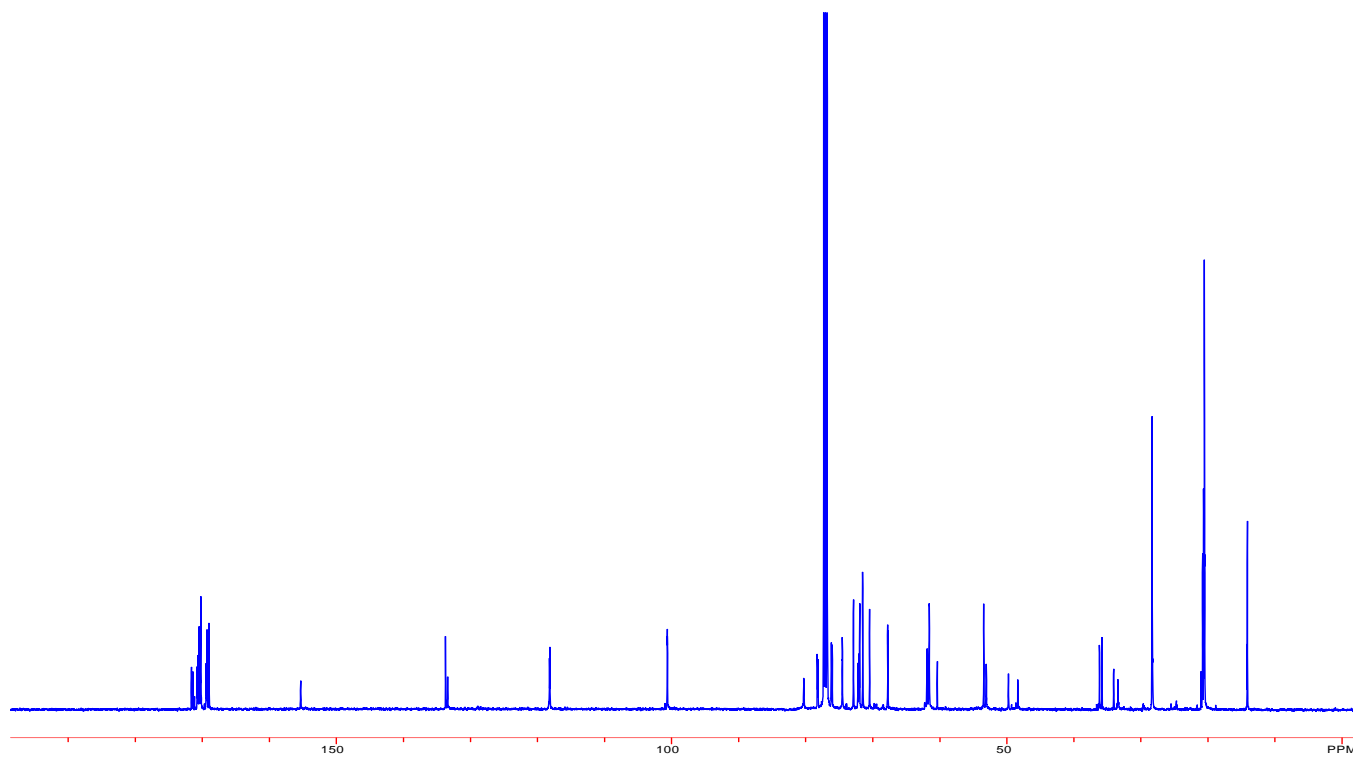









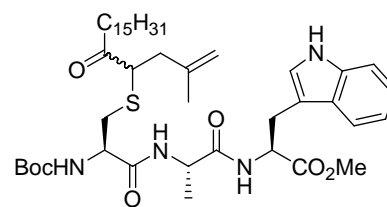

(21)

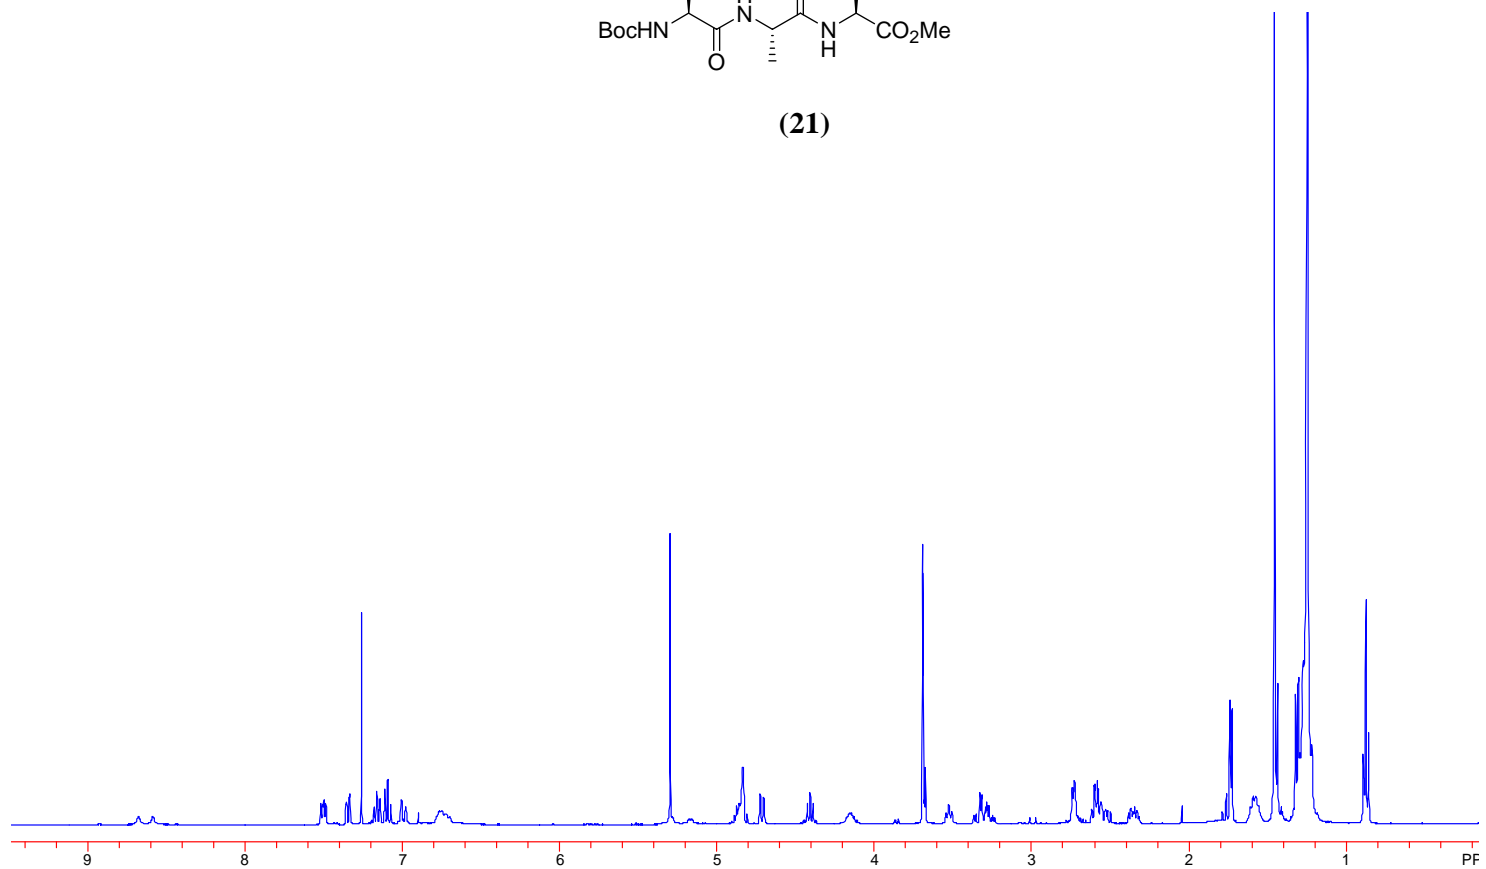

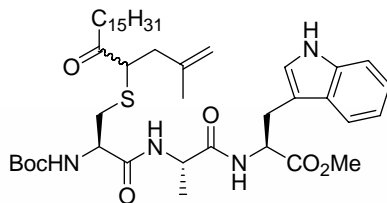

Carbon-13 standard parameters, BBO probe  
(21)

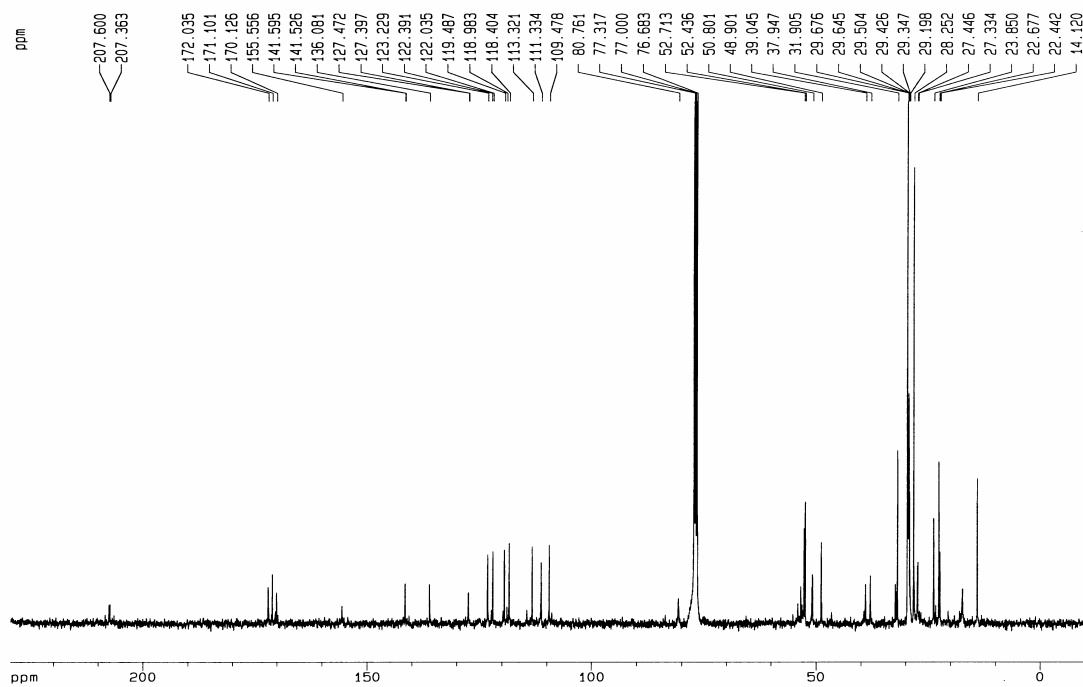

Current Data Parameters  
NAME fib208b  
EXPNO 2  
PROCNO 1

F2 - Acquisition Parameters  
Date\_ 20051001  
Time 8.32  
INSTRUM spect  
PROBHD 5 mm BBO BB-1  
PULPROG zgpg  
TD 32768  
SOLVENT CDC13  
NS 18000  
DS 2  
SWH 24154.590 Hz  
FIDRES 0.737140 Hz  
AQ 0.6783476 sec  
RG 10321.3  
DW 20.700 usec  
DE 29.57 usec  
TE 300.0 K  
d11 0.0300000 sec  
d12 0.0000200 sec  
PL13 19.00 dB  
D1 2.0000000 sec  
PCPD2 waltz16  
PCPD2 75.00 usec  
SFO2 400.1342220 MHz  
NUC2 1H  
PL2 -3.00 dB  
PL12 16.00 dB  
P1 5.00 usec  
SFO1 100.6242960 MHz  
NUC1 13C  
PL1 -3.00 dB

F2 - Processing parameters  
SI 32768  
SF 100.6132759 MHz  
WDW EM  
SSB 0  
LB 3.00 Hz  
GB 0  
PC 1.40

1D NMR plot parameters  
CX 20.00 cm  
F1P 229.866 ppm  
F1 23127.60 Hz  
F2P -10.207 ppm  
F2 -1026.93 Hz  
PPMCM 12.00368 ppm/cm  
HZCM 1207.72986 Hz/cm

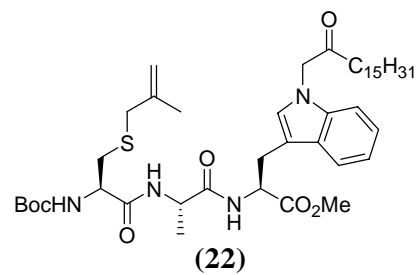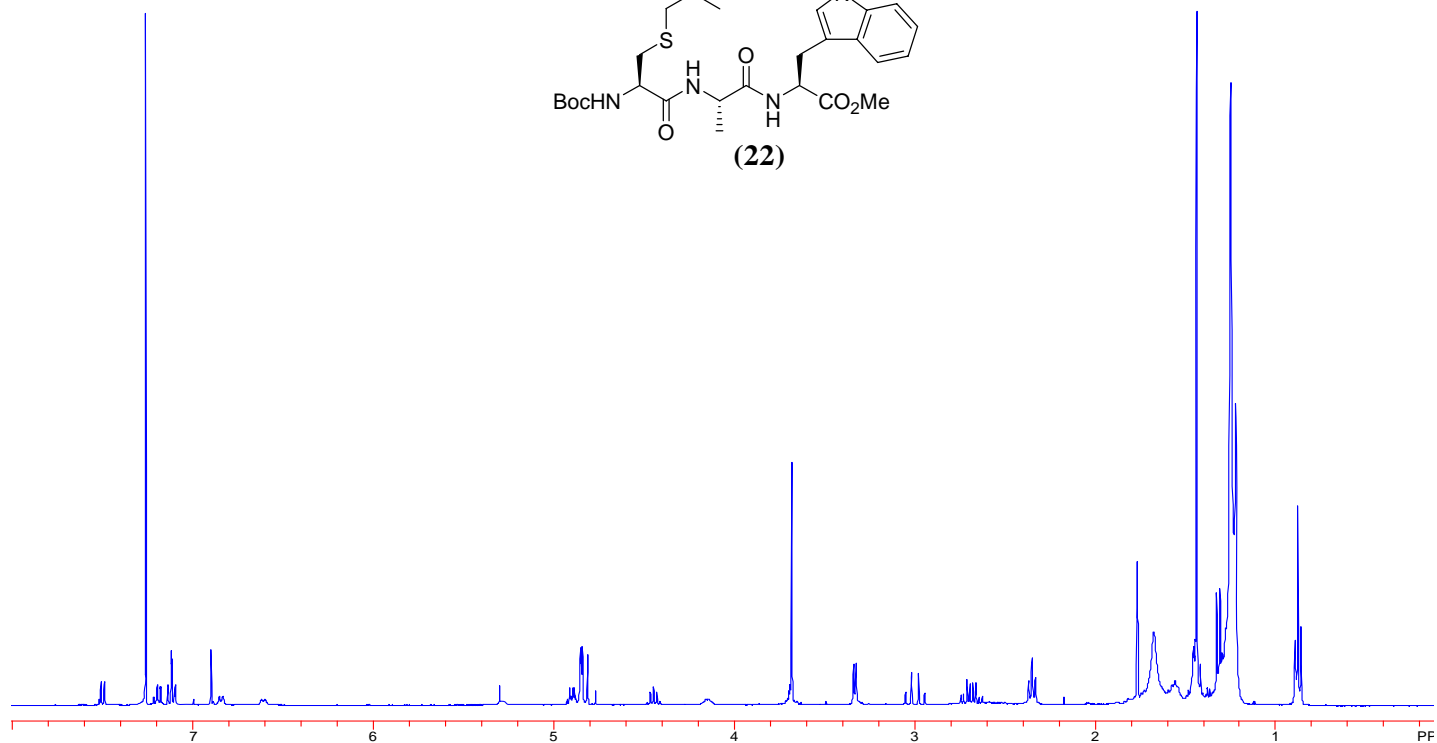



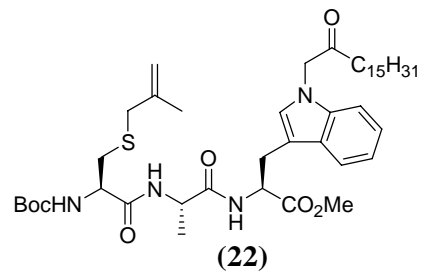

Carbon-13 standard parameters, BBO probe

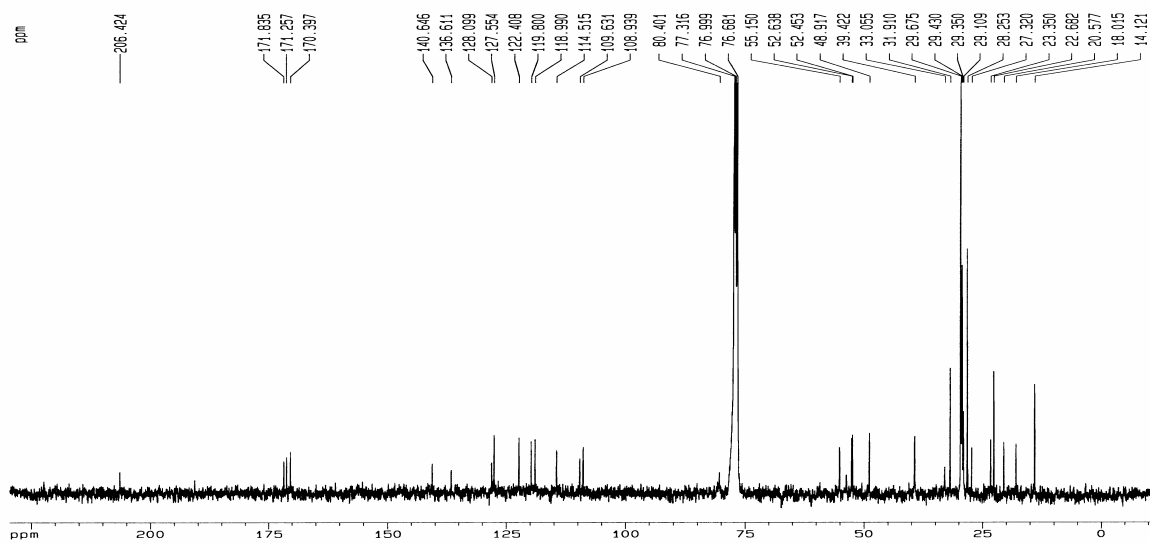

```

Current Data Parameters
NAME      flb179g-4
EXPNO    2
PROCNO   1

F2 - Acquisition Parameters
Date_    20050820
Time     9.01
INSTRUM  spect
PROBHD   5 mm BBO BB-1
PULPROG  zgpg
TD        32768
SOLVENT  CDCl3
NS        21000
DS        2
SWH       24154.590 Hz
FIDRES    0.737140 Hz
AQ        0.6783476 sec
RG         11585.2
DW         20.700 usec
DE         29.57 usec
TE         300.0 K
d11       0.03000000 sec
d12       0.00002000 sec
PL13      19.00 dB
D1        2.00000000 sec
CPDPRG2  waltz16
PCPD2     75.00 usec
SFO2      400.1342220 MHz
NUC2      13C
PL2        -3.00 dB
PL12      16.00 dB
P1         5.00 usec
SFO1      100.6242960 MHz
NUC1      13C
PL1        -3.00 dB

F2 - Processing parameters
SI         32768
SF         100.6132751 MHz
WDW        EM
SSB         0
LB          3.00 Hz
GB          0
PC          1.40

1D NMR plot parameters
CX         20.00 cm
F1P        229.574 ppm
F1         23098.15 Hz
F2P        -10.500 ppm
F2         -1056.43 Hz
PPMCM      12.00368 ppm/cm
HZCM       1207.72937 Hz/cm

```
